# Supplementary material for: ECMpy, a Simplified Workflow for Constructing Enzymatic Constrained Metabolic Network Model
Source: Preprints.org preprint supplement (doi:10.20944/preprints202112.0048.v1), 2021-12-03
Supplement: Supplementary file 1 [file supplementary]

## Sheet: Table S1 Modified genes 
Table S1 The modified genes
ID	Name	Equation	Gene_reaction_rule	Modified genes	Reason	Reference
FMNRx2	FMN reductase	fmn_c + h_c + nadph_c --> fmnh2_c + nadp_c	b0937 or b3844 or ( b2764 and b2763 )	b0937 or b3844 or b2764	CysIJ (b2763 and b2764) are the subunit of sulfite reductase, for this reaction only need b2764	Siegel et al. 1982
ARGabcpp	L-arginine transport via ABC system (periplasm)	arg__L_p + atp_c + h2o_c --> adp_c + arg__L_c + h_c + pi_c	( b2310 and b2308 and b2306 and b2307 ) or ( b0862 and b0860 and b0864 and b0863 and b0861 )	( b2310 and b2308 and b2306 and b2307 ) or ( b0862 and b0860 and b0864 and b0861 ) or ( b0862 and b0864 and b0863 and b0861 )	ArtI (b0863) is similar to the ArtJ (b0860) arginine binding periplasmic protein of E. coli	Wissenbach et al. 1995
ECAP1pp	Enterobacterial common antigen polymerase (periplasm)	2.0 unagamuf_p --> eca2und_p + h_p + udcpdp_p	b3785 and b3793	b3785 and b3793 and b3792	WzxE (b3792) is a "flippase" responsible for movement of lipid III across the membrane bilayer	Rick et al. 2003
ECAP2pp	Enterobacterial common antigen polymerase (periplasm)	eca2und_p + unagamuf_p --> eca3und_p + h_p + udcpdp_p	b3785 and b3793	b3785 and b3793 and b3792	WzxE (b3792) is a "flippase" responsible for movement of lipid III across the membrane bilayer	Rick et al. 2003
FADRx2	FAD reductase	fad_c + h_c + nadph_c --> fadh2_c + nadp_c	b2764 and b2763	b2764	CysIJ (b2763 and b2764) are the subunit of sulfite reductase, not for this reaction	Siegel et al. 1982
ECAP3pp	Enterobacterial common antigen polymerase (periplasm)	eca3und_p + unagamuf_p --> eca4und_p + h_p + udcpdp_p	b3785 and b3793	b3785 and b3793 and b3792	WzxE (b3792) is a "flippase" responsible for movement of lipid III across the membrane bilayer	Rick et al. 2003
BWCOGDS1	Tungsten bispterin guanine dinucleotide synthase (single GDP)	bwco_c + gtp_c + h_c --> bwco1gdp_c + ppi_c	( b3857 and b3856 ) or b3857	b3857	MobB (b3856) is only an adaptor protein, not a enzyme	Palmer et al. 1996
BWCOGDS2	Tungsten bispterin guanine dinucleotide synthase	bwco1gdp_c + gtp_c + h_c --> bwcogdp_c + ppi_c	( b3857 and b3856 ) or b3857	b3857	MobB (b3856) is only an adaptor protein, not a enzyme	Palmer et al. 1996
THZPSN3	Thiazole phosphate synthesis	atp_c + dhgly_c + dxyl5p_c + h_c + iscssh_c + nadph_c --> 4mpetz_c + amp_c + co2_c + 2.0 h2o_c + iscs_c + nadp_c + ppi_c	b3992 and b3990 and b0423 and b2530 and b4407	b3992 and b3990 and b0423 and b2530 and b4407 and b3991	ThiG (b3991) participates in the synthesis of the thiazole moiety of thiamine	Vander Horn et al. 1993
BMOGDS1	Bis-molybdopterin guanine dinucleotide synthase (single GDP)	bmoco_c + gtp_c + h_c --> bmoco1gdp_c + ppi_c	b3857 or ( b3857 and b3856 )	b3857	MobB (b3856) is only an adaptor protein, not a enzyme	Palmer et al. 1996
BMOGDS2	Bis-molybdopterin guanine dinucleotide synthase	bmoco1gdp_c + gtp_c + h_c --> bmocogdp_c + ppi_c	( b3857 and b3856 ) or b3857	b3857	MobB (b3856) is only an adaptor protein, not a enzyme	Palmer et al. 1996
MOGDS	Molybdopterin guanine dinucleotide synthase	gtp_c + h_c + moco_c --> mocogdp_c + ppi_c	( b3857 and b3856 ) or b3857	b3857	MobB (b3856) is only an adaptor protein, not a enzyme	Palmer et al. 1996
3NTD4pp	3'-nucleotidase (CMP) (periplasm)	3cmp_p + h2o_p --> cytd_p + pi_p	b0383 or b4213 or b0383	b0383 or b4213 or b2744	repeat
GLUDy	Glutamate dehydrogenase (NADP)	glu__L_c + h2o_c + nadp_c <=> akg_c + h_c + nadph_c + nh4_c	b1761 or ( b3213 and b3212 )	b1761	b3213 and b3212 encode glutamate synthase, the corresponding reaction is GLUSy
References
1. Palmer, T., C. L. Santini, C. Iobbi-Nivol, D. J. Eaves, D. H. Boxer and G. Giordano (1996). "Involvement of the narJ and mob gene products in distinct steps in the biosynthesis of the molybdoenzyme nitrate reductase in Escherichia coli." Mol Microbiol 20(4): 875-884.
2. Rick, P. D., K. Barr, K. Sankaran, J. Kajimura, J. S. Rush and C. J. Waechter (2003). "Evidence that the wzxE gene of Escherichia coli K-12 encodes a protein involved in the transbilayer movement of a trisaccharide-lipid intermediate in the assembly of enterobacterial. common antigen." J Biol Chem 278(19): 16534-16542
3. Siegel, L. M., D. C. 3. Rueger, M. J. Barber, R. J. Krueger, N. R. Orme-Johnson and W. H. Orme-Johnson (1982). "Escherichia coli sulfite reductase hemoprotein subunit. Prosthetic groups, catalytic parameters, and ligand complexes." J Biol Chem 257(11): 6343-6350.
4. Vander Horn, P. B., A. D. Backstrom, V. Stewart and T. P. Begley (1993). "Structural genes for thiamine biosynthetic enzymes (thiCEFGH) in Escherichia coli K-12." J Bacteriol 175(4): 982-992.
5. issenbach, U., S. Six, J. Bongaerts, D. Ternes, S. Steinwachs and G. Unden (1995). "A third periplasmic transport system for L-arginine in Escherichia coli: molecular characterization of the artPIQMJ genes, arginine binding and transport." Mol Microbiol 17(4): 675-686.

## Sheet: Table S2 Corrected parameters
Table S2 The corrected kinetic parameters
No	ID	Equation	kcat(original)	MW	kcat/MW(original )	kcat(1/h)(corrected)	kcat/MW(corrected)	growth rate
			(1/h)	(kDa)	(/h/kDa)	(1/h)	(/h/kDa)	(/h)
iML1515	/		None			/		0.8698
ECM1515			See Table S1 (original )					0.3685
The first set of corrected parameters:
1	GAPD	g3p_c + nad_c + pi_c --> 13dpg_c + h_c + nadh_c	104400	142.13	734.539	3596400	25303.6
2	ENO	2pg_c --> h2o_c + pep_c	86400	91.3099	946.228	828000	9068.02
3	FBA_num1	fdp_c --> dhap_c + g3p_c	37445.9	78.2945	478.27	313200	4000.28
4	NADH16pp	4.0 h_c + nadh_c + q8_c --> 3.0 h_p + nad_c + q8h2_c	700176	540.414	1295.63	5400000	9992.34
5	RBFSa	4r5au_c + db4p_c --> dmlz_c + 2.0 h2o_c + pi_c	36	969.391	0.0371367	7200	7.42735
6	KARA2	2ahbut_c + h_c + nadph_c --> 23dhmp_c + nadp_c	2700	216.276	12.484	281880	1303.33
7	ACCOAC	accoa_c + atp_c + hco3_c --> adp_c + h_c + malcoa_c + pi_c	28564.9	252.456	113.148	132480	524.766
8	METS_num2	5mthf_c + hcys__L_c --> h_c + met__L_c + thf_c	1116	84.6735	13.18	3596400	42473.7
9	GND	6pgc_c + nadp_c --> co2_c + nadph_c + ru5p__D_c	79200	102.963	769.211	1170000	11363.3
10	GHMT2r	ser__L_c + thf_c --> gly_c + h2o_c + mlthf_c	11520	90.6332	127.106	3596400	39680.8
11	GLNS	atp_c + glu__L_c + nh4_c --> adp_c + gln__L_c + h_c + pi_c	119723	622.845	192.22	3596400	5774.15
12	PPC	co2_c + h2o_c + pep_c --> h_c + oaa_c + pi_c	165600	396.25	417.918	3596400	9076.08
13	METAT	atp_c + h2o_c + met__L_c --> amet_c + pi_c + ppi_c	21.6	167.806	0.12872	27000	160.9
14	PGI	g6p_c --> f6p_c	255600	123.059	2077.04	41112000	334082
ECM1515_round1								0.5594
The second set of corrected parameters:
13	AKGDH	akg_c + coa_c + nad_c --> co2_c + nadh_c + succoa_c	112697	2418.39	46.6002	3596400	1487.1
14	PDH	coa_c + nad_c + pyr_c --> accoa_c + co2_c + nadh_c	270262	4586.61	58.924	3596400	784.108
ECM1515_round2								0.6802

## Sheet:  Table S3 Kinetic parameters
Table S3 The kinetic parameters
id	MW(kDa)	kcat(1/h)(original)	kcat/MW(original )	kcat(1/h)(corrected)	kcat/MW(corrected)
ALATA_D2_num1	90.6332	9300.51	102.617	9300.51	102.617
ALATA_D2_num2	145.979	9300.51	63.7114	9300.51	63.7114
SHCHD2	99.9028	1224	12.2519	1224	12.2519
CPPPGO	68.6453	900	13.1109	900	13.1109
GTHOr	97.545	25901.6	265.535	25901.6	265.535
DHORD5	36.7745	38657.2	1051.2	38657.2	1051.2
GLYCTO2	137.283	50485.5	367.748	50485.5	367.748
GLYCTO3	137.283	57086.1	415.829	57086.1	415.829
GLYCTO4	137.283	117078	852.822	117078	852.822
PFK_3	139.368	208800	1498.19	208800	1498.19
TRPS2	143.414	9309.21	64.9113	9309.21	64.9113
G3PD5_num1	148.423	60326.2	406.446	60326.2	406.446
G3PD5_num2	113.501	60326.2	531.503	60326.2	531.503
LEUTAi_num1	204.562	54098.6	264.461	54098.6	264.461
LEUTAi_num2	87.0756	54098.6	621.283	54098.6	621.283
SHK3Dr	29.4136	46104.6	1567.46	46104.6	1567.46
SHK3Dr_reverse	62.4556	29504.4	472.406	29504.4	472.406
G5SD	178.52	50400	282.321	50400	282.321
ALATA_L2_num1	145.979	22488	154.05	22488	154.05
ALATA_L2_num2	90.6332	22488	248.122	22488	248.122
MAN6PI	42.85	39462.1	920.937	39462.1	920.937
APRAUR	80.6766	1152	14.2792	1152	14.2792
DB4PS	46.7069	1224	26.206	1224	26.206
RBFK	34.7343	324	9.32796	324	9.32796
ACP1_FMN_num1	30.3709	23467.2	772.688	23467.2	772.688
ACP1_FMN_num2	27.1218	23467.2	865.254	23467.2	865.254
ACP1_FMN_num3	30.1962	23467.2	777.159	23467.2	777.159
RBFSb	70.3347	108	1.53552	108	1.53552
DMATT	32.1596	432	13.433	432	13.433
GRTT	32.1596	432	13.433	432	13.433
UPP3S	27.7979	3600	129.506	3600	129.506
UPPDC1	39.2481	2916	74.2966	2916	74.2966
TMDPP	94.4142	30479	322.822	30479	322.822
HCO3E_num1	100.387	32760	326.337	32760	326.337
HCO3E_num2	47.5285	32760	689.271	32760	689.271
IMPC	57.3292	17248.1	300.86	17248.1	300.86
IMPD	208.09	6480	31.1404	6480	31.1404
ECOAH4_num1	77.0722	41618.9	539.998	41618.9	539.998
ECOAH4_num2	159.188	41618.9	261.445	41618.9	261.445
GLUTRS	53.8157	324	6.02055	324	6.02055
TMPPP	23.0153	72	3.12835	72	3.12835
URIK1	24.3531	19423.5	797.58	19423.5	797.58
URIK2	24.3531	9433.62	387.368	9433.62	387.368
CYTDK1	24.3531	9981.45	409.864	9981.45	409.864
CYTDK2	24.3531	9559.09	392.52	9559.09	392.52
XPPT	67.8824	10439.9	153.794	10439.9	153.794
HXPRT_num1	67.8824	17665.8	260.242	17665.8	260.242
HXPRT_num2	80.461	17665.8	219.558	17665.8	219.558
NDPK5_num1	23.586	9864.91	418.253	9864.91	418.253
NDPK5_num2	61.8538	9864.91	159.488	9864.91	159.488
DHORTS	77.6548	37265.8	479.891	37265.8	479.891
OMPDC	52.7005	86400	1639.45	86400	1639.45
CS	288.09	104400	362.387	104400	362.387
ICDHyr	91.5134	39600	432.724	39600	432.724
ACALD_num1	33.4425	347838	10401.1	347838	10401.1
ACALD_num2	3845.09	347838	90.463	347838	90.463
ACS	72.0936	32028.8	444.267	32028.8	444.267
PPA_num1	116.272	303343	2608.91	303343	2608.91
PPA_num2	26.9004	303343	11276.5	303343	11276.5
PPA_num3	118.221	303343	2565.89	303343	2565.89
PPCK	59.6435	97061.5	1627.36	97061.5	1627.36
ME1	252.789	60940.1	241.071	60940.1	241.071
ALAR_num1	77.6892	113968	1466.97	113968	1466.97
ALAR_num2	78.3059	113968	1455.42	113968	1455.42
ALATA_L_num1	91.0347	63159.7	693.798	63159.7	693.798
ALATA_L_num2	92.4324	63159.7	683.307	63159.7	683.307
XYLK_num1	122.179	24801.5	202.993	24801.5	202.993
XYLK_num2	105.237	24801.5	235.674	24801.5	235.674
RBK	64.581	59351.2	919.019	59351.2	919.019
GLYK	224.923	45670.4	203.049	45670.4	203.049
PPM	44.37	158919	3581.68	158919	3581.68
ASPTA_num1	87.1467	13921.6	159.75	13921.6	159.75
ASPTA_num2	87.0756	13921.6	159.88	13921.6	159.88
FBP_num1	68.6469	274394	3997.18	274394	3997.18
FBP_num2	147.336	274394	1862.37	274394	1862.37
FBP_num3	71.7046	274394	3826.73	274394	3826.73
FBP_num4	29.7211	274394	9232.3	274394	9232.3
GLGC	194.791	18829.6	96.6659	18829.6	96.6659
PYK_num1	205.429	427445	2080.75	427445	2080.75
PYK_num2	202.918	427445	2106.49	427445	2106.49
A5PISO_num1	140.784	55549.2	394.569	55549.2	394.569
A5PISO_num2	136.126	55549.2	408.073	55549.2	408.073
IPPMIb	72.3693	23255.1	321.339	23255.1	321.339
ACHBS_num1	143.093	67064.9	468.681	67064.9	468.681
ACHBS_num2	161.922	67064.9	414.18	67064.9	414.18
ACLS_num1	161.922	241177	1489.46	241177	1489.46
ACLS_num2	143.093	241177	1685.46	241177	1685.46
PSCVT	46.0958	75600	1640.06	75600	1640.06
ANS	228.729	17527	76.6278	17527	76.6278
ANPRT	113.74	18000	158.256	18000	158.256
CHORM_num1	86.2227	123098	1427.68	123098	1427.68
CHORM_num2	84.085	123098	1463.97	123098	1463.97
CHORS	156.55	151200	965.827	151200	965.827
IGPS	49.4923	18000	363.693	18000	363.693
ECOAH6_num1	77.0722	36594	474.801	36594	474.801
ECOAH6_num2	159.188	36594	229.879	36594	229.879
ENO	91.3099	86400	946.228	828000	9068.02
FBA_num1	78.2945	37445.9	478.27	313200	4000.28
FBA_num2	381.092	37445.9	98.2596	37445.9	98.2596
MGSA	101.511	10091.6	99.4138	10091.6	99.4138
PPS	174.87	370889	2120.94	370889	2120.94
PGI	123.059	255600	2077.04	41112000	334082
PGK	41.1182	81612.7	1984.83	81612.7	1984.83
EDA	66.8521	44337.5	663.218	44337.5	663.218
PGL	36.3076	662400	18244.1	662400	18244.1
RPE	24.5542	198533	8085.51	198533	8085.51
TALA_num1	70.4385	49937.7	708.955	49937.7	708.955
TALA_num2	35.6588	49937.7	1400.43	49937.7	1400.43
TKT1_num1	144.423	182904	1266.44	182904	1266.44
TKT1_num2	73.0427	182904	2504.07	182904	2504.07
G6PDA	178.645	151224	846.506	151224	846.506
ALCD2x_num1	3845.09	65388.1	17.0056	65388.1	17.0056
ALCD2x_num2	141.518	65388.1	462.047	65388.1	462.047
ALDD2y_num1	29.4102	22093.2	751.208	22093.2	751.208
ALDD2y_num2	84.194	22093.2	262.408	22093.2	262.408
ALDD2y_num3	225.225	22093.2	98.0936	22093.2	98.0936
ALDD2y_num4	31.488	22093.2	701.638	22093.2	701.638
ALDD2y_num5	36.5018	22093.2	605.262	22093.2	605.262
RMI	188.798	34889	184.795	34889	184.795
FMNAT	34.7343	324	9.32796	324	9.32796
NADDP_num1	59.3779	10638	179.158	10638	179.158
NADDP_num2	73.6061	10638	144.526	10638	144.526
NMNAT_num1	189.383	9306.72	49.1422	9306.72	49.1422
NMNAT_num2	24.528	9306.72	379.432	9306.72	379.432
HMPK1_num1	114.534	15927.8	139.065	15927.8	139.065
HMPK1_num2	61.6948	15927.8	258.17	15927.8	258.17
NDPK6_num1	23.586	9855.58	417.857	9855.58	417.857
NDPK6_num2	61.8538	9855.58	159.337	9855.58	159.337
NDPK8_num1	23.586	15171.9	643.257	15171.9	643.257
NDPK8_num2	61.8538	15171.9	245.286	15171.9	245.286
PYNP2r	162.954	44972.7	275.983	44972.7	275.983
DURIPP_num1	94.4142	31920.2	338.087	31920.2	338.087
DURIPP_num2	155.7	31920.2	205.012	31920.2	205.012
PTRCTA	99.3227	36125.8	363.721	36125.8	363.721
CYSDS_num1	172.85	13182.4	76.2651	13182.4	76.2651
CYSDS_num2	211.094	13182.4	62.448	13182.4	62.448
TRPAS2	211.094	23909.4	113.264	23909.4	113.264
NDP3_num1	17.4329	34101.5	1956.16	34101.5	1956.16
NDP3_num2	35.3527	34101.5	964.607	34101.5	964.607
CDPPH	35.3527	28855.4	816.214	28855.4	816.214
NDP7	35.3527	33721.6	953.862	33721.6	953.862
PMDPHT_num1	30.1962	9471.62	313.669	9471.62	313.669
PMDPHT_num2	27.1218	9471.62	349.225	9471.62	349.225
ILETA	204.562	22229.7	108.67	22229.7	108.67
VALTA	204.562	9473.11	46.3093	9473.11	46.3093
ORPT	47.134	11843.9	251.282	11843.9	251.282
RBFSa	969.391	36	0.0371367	7200	7.42735
DHAD2	131.063	500400	3818.01	500400	3818.01
G1PP_num1	22.7318	9921.66	436.466	9921.66	436.466
G1PP_num2	23.0075	9921.66	431.236	9921.66	431.236
G1PP_num3	29.7211	9921.66	333.825	9921.66	333.825
PFL_num1	118.389	66265.4	559.724	66265.4	559.724
PFL_num2	198.919	66265.4	333.128	66265.4	333.128
PFL_num3	114.14	66265.4	580.564	66265.4	580.564
PFL_num4	213.203	66265.4	310.809	66265.4	310.809
FRD2	121.217	39705.4	327.558	39705.4	327.558
FRD3	121.217	40135.5	331.106	40135.5	331.106
POX	248.046	11451.8	46.1683	11451.8	46.1683
PTAr_num1	463.033	547822	1183.12	547822	1183.12
PTAr_num2	72.1335	547822	7594.55	547822	7594.55
ACKr_num1	42.4337	168823	3978.52	168823	3978.52
ACKr_num2	43.2904	168823	3899.78	168823	3899.78
ACKr_num3	43.3841	168823	3891.36	168823	3891.36
MOAT	47.2911	212400	4491.33	212400	4491.33
UDCPDPS	56.8883	504	8.85947	504	8.85947
USHD	26.8942	20475.1	761.321	20475.1	761.321
LPADSS	84.7649	187200	2208.46	187200	2208.46
TDSK	35.5893	26884.7	755.416	26884.7	755.416
NTPP1_num1	14.9271	29218.1	1957.38	29218.1	1957.38
NTPP1_num2	60.8246	29218.1	480.366	29218.1	480.366
NTPP2_num1	14.9271	10172.3	681.467	10172.3	681.467
NTPP2_num2	60.8246	10172.3	167.24	10172.3	167.24
NTPTP1	356.298	28199.9	79.147	28199.9	79.147
NTPTP2	356.298	58754.9	164.904	58754.9	164.904
IPMD_num1	79.034	17640	223.195	17640	223.195
IPMD_num2	40.3149	17640	437.555	17640	437.555
AIRC3	142.243	11996.2	84.3364	11996.2	84.3364
ADSL2r	206.171	54000	261.918	54000	261.918
PUNP5_num1	179.008	18776.9	104.894	18776.9	104.894
PUNP5_num2	155.7	18776.9	120.597	18776.9	120.597
PUNP6_num1	155.7	19606.6	125.926	19606.6	125.926
PUNP6_num2	179.008	19606.6	109.529	19606.6	109.529
PUNP7	179.008	19138.4	106.914	19138.4	106.914
RNDR1_num1	274.14	9882.91	36.0506	9882.91	36.0506
RNDR1_num2	270.392	9882.91	36.5503	9882.91	36.5503
RNDR3_num1	270.392	12566.5	46.4751	12566.5	46.4751
RNDR3_num2	274.14	12566.5	45.8396	12566.5	45.8396
RNDR4_num1	270.392	10859.5	40.1621	10859.5	40.1621
RNDR4_num2	274.14	10859.5	39.6129	10859.5	39.6129
TMDS	60.9594	26640	437.012	26640	437.012
TMDK1	23.4566	9983.48	425.615	9983.48	425.615
PPCDC	521.258	540	1.03596	540	1.03596
FTHFD	191.608	11273.5	58.8364	11273.5	58.8364
EDD	64.639	48328.8	747.672	48328.8	747.672
DHQTi	54.9333	212400	3866.51	212400	3866.51
PUNP1	155.7	17754.5	114.03	17754.5	114.03
PUNP2	155.7	16381.2	105.21	16381.2	105.21
PUNP3_num1	179.008	16041.3	89.6123	16041.3	89.6123
PUNP3_num2	155.7	16041.3	103.027	16041.3	103.027
LYSAM	38.7496	26321.8	679.279	26321.8	679.279
DHAD1	131.063	1512000	11536.4	1512000	11536.4
IPPMIa	72.3693	11963.9	165.318	11963.9	165.318
G3PD7	148.423	97058.7	653.931	97058.7	653.931
NADH9_num1	40.34	10293.4	255.167	10293.4	255.167
NADH9_num2	47.3587	10293.4	217.35	10293.4	217.35
NADH9_num3	83.3822	10293.4	123.449	10293.4	123.449
NADH9_num4	40.7511	10293.4	252.593	10293.4	252.593
NADH10_num1	40.34	21675	537.309	21675	537.309
NADH10_num2	47.3587	21675	457.678	21675	457.678
NADH10_num3	40.7511	21675	531.889	21675	531.889
NADH10_num4	83.3822	21675	259.948	21675	259.948
MDH	64.6746	25920	400.776	25920	400.776
FUM_num1	120.211	104335	867.934	104335	867.934
FUM_num2	120.597	104335	865.152	104335	865.152
FUM_num3	201.956	104335	516.623	104335	516.623
PYDXNK	61.6948	9300.85	150.756	9300.85	150.756
PYAM5PO	51.0903	9300.85	182.047	9300.85	182.047
OHPBAT	79.5666	3.6	0.0452451	3.6	0.0452451
GLUTRR	92.6136	9680.98	104.531	9680.98	104.531
GLCS1	52.8224	12943.1	245.03	12943.1	245.03
GLCP_num1	186.345	26911.8	144.419	26911.8	144.419
GLCP_num2	181.045	26911.8	148.647	26911.8	148.647
HEMEOS	32.2485	10296.7	319.292	10296.7	319.292
ADMDC	30.3846	99039.6	3259.53	99039.6	3259.53
AGMT	67.1141	34948.1	520.727	34948.1	520.727
ARGDC	844.252	10396.3	12.3142	10396.3	12.3142
ARGSS	199.594	10080	50.5026	10080	50.5026
AGPR	35.9521	27140.7	754.913	27140.7	754.913
SPMS	64.6428	20729.8	320.682	20729.8	320.682
G1SAT	90.7322	324	3.57095	324	3.57095
KDOCT2	27.6144	15120	547.54	15120	547.54
OAADC	66.8521	17454.6	261.092	17454.6	261.092
MNNH	44.838	54841.5	1223.1	54841.5	1223.1
ALTRH	54.0931	69858.5	1291.45	69858.5	1291.45
GUI1	53.9872	86159.2	1595.92	86159.2	1595.92
PGAMT	47.5436	36035.5	757.946	36035.5	757.946
UAGDP	147.57	57600	390.323	57600	390.323
UAGCVT	44.8176	11880	265.074	11880	265.074
GLUR	31.002	88419.5	2852.06	88419.5	2852.06
UAG2E	84.4892	57209.2	677.118	57209.2	677.118
MACPD	85.2266	17858.9	209.546	17858.9	209.546
DMQMT	53.1109	22755.7	428.456	22755.7	428.456
ICHORS_copy1	42.9316	50074.2	1166.37	50074.2	1166.37
HACD5_num1	159.188	40209.2	252.59	40209.2	252.59
HACD5_num2	77.0722	40209.2	521.708	40209.2	521.708
HPPK2	18.0788	576	31.8605	576	31.8605
PTPATi	107.02	1980	18.5012	1980	18.5012
HEX7	32.4998	31531	970.189	31531	970.189
DXPRIi	86.776	11880	136.904	11880	136.904
OPHBDC	333.623	9504.98	28.4902	9504.98	28.4902
OHPHM	53.1109	24071.5	453.232	24071.5	453.232
GHMT2r	90.6332	11520	127.106	3596400	39680.8
DHORD2	36.7745	72000	1957.88	72000	1957.88
ADK4	23.586	9420.74	399.421	9420.74	399.421
INSK	96.8976	38426.5	396.569	38426.5	396.569
ABTA_num1	91.5493	33854	369.79	33854	369.79
ABTA_num2	44.7291	33854	756.867	33854	756.867
SSALx	99.4357	21753	218.764	21753	218.764
ASPT	209.424	20574.1	98.2412	20574.1	98.2412
SERD_L_num1	211.094	78829.1	373.431	78829.1	373.431
SERD_L_num2	48.9066	78829.1	1611.83	78829.1	1611.83
SERD_L_num3	97.0433	78829.1	812.308	78829.1	812.308
SERD_L_num4	48.7529	78829.1	1616.91	78829.1	1616.91
SERD_L_num5	140.93	78829.1	559.351	78829.1	559.351
THRD_num1	148.956	74588.9	500.744	74588.9	500.744
THRD_num2	40.3513	74588.9	1848.49	74588.9	1848.49
KARA1	216.276	15966.5	73.8244	15966.5	73.8244
KARA2	216.276	2700	12.484	281880	1303.33
ACCOAC	252.456	28564.9	113.148	132480	524.766
NADK	195.398	3960	20.2663	3960	20.2663
ICHORS_copy2	97.5291	24753.8	253.81	24753.8	253.81
SUCBZS	35.4766	25538	719.854	25538	719.854
DHBD	104.999	14590	138.954	14590	138.954
ICHORT	32.5543	13917.9	427.53	13917.9	427.53
RBK_L1	122.179	26478.9	216.722	26478.9	216.722
RBP4E_num1	25.2777	84320.8	3335.78	84320.8	3335.78
RBP4E_num2	102.076	84320.8	826.062	84320.8	826.062
RBP4E_num3	25.5609	84320.8	3298.82	84320.8	3298.82
NTD2_num1	25.3006	9722.77	384.29	9722.77	384.29
NTD2_num2	26.9004	9722.77	361.436	9722.77	361.436
NTD2_num3	27.1631	9722.77	357.94	9722.77	357.94
NTD4_num1	26.9004	25068.7	931.907	25068.7	931.907
NTD4_num2	27.1631	25068.7	922.894	25068.7	922.894
NTD5_num1	45.4161	10199.2	224.573	10199.2	224.573
NTD5_num2	26.9004	10199.2	379.148	10199.2	379.148
NTD5_num3	25.3006	10199.2	403.122	10199.2	403.122
NTD5_num4	20.2554	10199.2	503.532	10199.2	503.532
NTD6_num1	45.4161	14096.1	310.376	14096.1	310.376
NTD6_num2	26.9004	14096.1	524.009	14096.1	524.009
NTD6_num3	20.2554	14096.1	695.916	14096.1	695.916
LGTHL	29.8397	9557.44	320.293	9557.44	320.293
PYDXPP_num1	30.2013	29369.9	972.472	29369.9	972.472
PYDXPP_num2	30.3709	29369.9	967.041	29369.9	967.041
PYDXPP_num3	29.7077	29369.9	988.629	29369.9	988.629
PYDXPP_num4	27.1631	29369.9	1081.24	29369.9	1081.24
PDXPP	30.2013	22698	751.557	22698	751.557
HACD6_num1	159.188	31487.3	197.8	31487.3	197.8
HACD6_num2	77.0722	31487.3	408.543	31487.3	408.543
ECOAH1_num1	77.0722	43149.3	559.855	43149.3	559.855
ECOAH1_num2	159.188	43149.3	271.059	43149.3	271.059
ECOAH2_num1	77.0722	48500.5	629.287	48500.5	629.287
ECOAH2_num2	159.188	48500.5	304.675	48500.5	304.675
ECOAH3_num1	77.0722	44125.8	572.525	44125.8	572.525
ECOAH3_num2	159.188	44125.8	277.193	44125.8	277.193
UGLT	79.2914	67891.4	856.226	67891.4	856.226
DXPS	135.234	3960	29.2826	3960	29.2826
CDPMEK	61.8507	4680	75.6661	4680	75.6661
MECDPS	50.6926	324	6.39147	324	6.39147
DDGLK	33.9624	171581	5052.1	171581	5052.1
XYLI2	198.968	37166.1	186.794	37166.1	186.794
PMANM	50.4626	28985.1	574.388	28985.1	574.388
ICL	190.086	58476.2	307.63	58476.2	307.63
GLYCL	364.088	36542.3	100.367	36542.3	100.367
HCYSMT	33.4228	39542.5	1183.1	39542.5	1183.1
UDPG4E	74.5302	13617.8	182.715	13617.8	182.715
LACZ	465.931	74153.4	159.151	74153.4	159.151
TRE6PH	63.8377	31368.1	491.372	31368.1	491.372
XYLI1	198.968	23950.6	120.374	23950.6	120.374
PPC	396.25	165600	417.918	3596400	9076.08
G3PT_num1	30.4128	9873.83	324.66	9873.83	324.66
G3PT_num2	27.1631	9873.83	363.501	9873.83	363.501
CINNDO	126.995	34531.8	271.914	34531.8	271.914
DHPPD	28.4996	16735.6	587.224	16735.6	587.224
DHCIND	28.4996	14890.5	522.48	14890.5	522.48
CITL	614.1	144634	235.522	144634	235.522
GOFUCR	72.2823	10022.3	138.655	10022.3	138.655
PYDXK_num1	61.6948	9301.04	150.759	9301.04	150.759
PYDXK_num2	62.6444	9301.04	148.474	9301.04	148.474
GTPCII2	43.672	432	9.89192	432	9.89192
SADT2	350.987	102442	291.868	102442	291.868
LCARS	81.0267	12525.2	154.581	12525.2	154.581
ALCD19_num1	141.518	66988.9	473.359	66988.9	473.359
ALCD19_num2	3845.09	66988.9	17.4219	66988.9	17.4219
RMPA	120.582	25917.5	214.937	25917.5	214.937
SBTPD	111.431	16357.8	146.797	16357.8	146.797
PFK_2	139.368	28730	206.144	28730	206.144
GLTPD	74.7803	22429	299.933	22429	299.933
TGBPA_num1	172.367	31362.8	181.953	31362.8	181.953
TGBPA_num2	77.9206	31362.8	402.496	31362.8	402.496
MANAO	53.5802	42550.2	794.14	42550.2	794.14
TAGURr	54.8083	28666.3	523.029	28666.3	523.029
PGLYCP	27.3892	10590.8	386.68	10590.8	386.68
GLXCL	129.464	50871.8	392.943	50871.8	392.943
TARTD	110.826	40271.5	363.376	40271.5	363.376
GLCRAL	164.305	24765.1	150.727	24765.1	150.727
KAS14_num1	85.2266	9362.98	109.86	9362.98	109.86
KAS14_num2	86.0915	9362.98	108.756	9362.98	108.756
EDTXS1	35.4068	12691.8	358.455	12691.8	358.455
EDTXS2	37.4104	22707.4	606.981	22707.4	606.981
EDTXS3	35.4934	16672.7	469.74	16672.7	469.74
EDTXS4	37.4104	63673.5	1702.03	63673.5	1702.03
NNDPR	65.5241	1656	25.2731	1656	25.2731
HACD4_num1	159.188	38552.4	242.182	38552.4	242.182
HACD4_num2	77.0722	38552.4	500.211	38552.4	500.211
HACD7_num1	77.0722	34363.1	445.856	34363.1	445.856
HACD7_num2	159.188	34363.1	215.865	34363.1	215.865
AACPS1	89.3395	9300.09	104.098	9300.09	104.098
SDPDS	82.538	1540800	18667.8	1540800	18667.8
DMSOR1_num1	233.042	51527.6	221.108	51527.6	221.108
DMSOR1_num2	144.094	51527.6	357.597	51527.6	357.597
DKGLCNR2y	70.791	17120.4	241.844	17120.4	241.844
2DGULRy	70.791	19562.4	276.34	19562.4	276.34
RZ5PP	23.3085	14207.2	609.527	14207.2	609.527
NTD9_num1	20.2554	9725.2	480.129	9725.2	480.129
NTD9_num2	26.9004	9725.2	361.526	9725.2	361.526
NTD9_num3	25.3988	9725.2	382.9	9725.2	382.9
NTD9_num4	27.1631	9725.2	358.03	9725.2	358.03
NTD10	26.9004	9327.14	346.729	9327.14	346.729
ADPT	39.7178	10116.3	254.705	10116.3	254.705
ADK1	23.586	111600	4731.62	111600	4731.62
OCTDPS	70.4339	1080	15.3335	1080	15.3335
AACPS2	89.3395	9300.08	104.098	9300.08	104.098
AACPS3	89.3395	20818.5	233.027	20818.5	233.027
AACPS4	89.3395	19801.5	221.643	19801.5	221.643
AMANK	29.6439	18940.2	638.924	18940.2	638.924
ACNML	130.374	22534.2	172.843	22534.2	172.843
CAT_num1	336.65	190740	566.583	190740	566.583
CAT_num2	320.095	190740	595.886	190740	595.886
SERASr	141.991	58615.1	412.808	58615.1	412.808
DMSOR2	144.094	94768.5	657.686	94768.5	657.686
ACMAMUT	27.9282	20034.2	717.346	20034.2	717.346
DDGALK	31.3736	25598.3	815.919	25598.3	815.919
AB6PGH_num1	53.1613	42497.1	799.398	42497.1	799.398
AB6PGH_num2	55.3608	42497.1	767.638	42497.1	767.638
AB6PGH_num3	53.9349	42497.1	787.933	42497.1	787.933
AMALT1	78.5035	57278	729.624	57278	729.624
MLTP2	181.045	27243.4	150.479	27243.4	150.479
PACCOAL	48.9529	21124.1	431.519	21124.1	431.519
GP4GH	31.2967	10828.7	346.003	10828.7	346.003
ACGAMT	81.9145	10386.8	126.801	10386.8	126.801
AADDGT	40.6396	231888	5705.96	231888	5705.96
GMHEPK	102.101	1.50208e+06	14711.7	1.50208e+06	14711.7
TRE6PS	53.6112	26430.2	492.997	26430.2	492.997
UDCPDP_num1	29.0213	15096.4	520.183	15096.4	520.183
UDCPDP_num2	22.3986	15096.4	673.988	15096.4	673.988
UDCPDP_num3	29.7588	15096.4	507.291	15096.4	507.291
TREH	63.6967	19724.5	309.663	19724.5	309.663
CYTK1	24.7463	86400	3491.43	86400	3491.43
CYTK2	24.7463	25750.1	1040.56	25750.1	1040.56
GK1	47.1854	151200	3204.38	151200	3204.38
HACD1_num1	159.188	38780.6	243.616	38780.6	243.616
HACD1_num2	77.0722	38780.6	503.173	38780.6	503.173
HACD2_num1	159.188	39035.1	245.214	39035.1	245.214
HACD2_num2	77.0722	39035.1	506.475	39035.1	506.475
ACACCT_num1	92.9717	27123.7	291.742	27123.7	291.742
ACACCT_num2	57.5623	27123.7	471.207	27123.7	471.207
BUTCT	92.9717	46898	504.433	46898	504.433
2DGULRx	70.791	20094.5	283.857	20094.5	283.857
G1PTT_num1	130.774	10400.1	79.5275	10400.1	79.5275
G1PTT_num2	130.938	10400.1	79.4283	10400.1	79.4283
TDPGDH_num1	39.7538	24678.1	620.773	24678.1	620.773
TDPGDH_num2	81.1167	24678.1	304.23	24678.1	304.23
UDPGALM	42.9659	651626	15166.1	651626	15166.1
TDPDRE	21.2701	18583.9	873.711	18583.9	873.711
TDPDRR	32.6941	14288.3	437.03	14288.3	437.03
G3PD6	148.423	29478.3	198.609	29478.3	198.609
ALLTN	198.406	150251	757.288	150251	757.288
UAPGR	37.851	154800	4089.72	154800	4089.72
NDPK7_num1	23.586	9921.02	420.632	9921.02	420.632
NDPK7_num2	61.8538	9921.02	160.395	9921.02	160.395
GLYAT	86.2341	10460.3	121.301	10460.3	121.301
ADNUC	32.5608	45598.7	1400.42	45598.7	1400.42
GMHEPPA	21.2942	283427	13310.1	283427	13310.1
S7PI	83.259	32534.7	390.765	32534.7	390.765
TRPS3	143.414	35739.9	249.207	35739.9	249.207
CRNBTCT	90.2535	21541.3	238.676	21541.3	238.676
CRNCBCT	90.2535	22065.3	244.481	22065.3	244.481
CRNCDH	28.1902	39436.1	1398.93	39436.1	1398.93
FADRx	26.242	1090800	41567	1090800	41567
GTPDPK	83.8756	21923.9	261.385	21923.9	261.385
NDPK2_num1	23.586	24602.1	1043.08	24602.1	1043.08
NDPK2_num2	61.8538	24602.1	397.747	24602.1	397.747
NDPK3_num1	61.8538	17317.2	279.97	17317.2	279.97
NDPK3_num2	23.586	17317.2	734.215	17317.2	734.215
NDPK4_num1	23.586	12739.6	540.134	12739.6	540.134
NDPK4_num2	61.8538	12739.6	205.963	12739.6	205.963
FCLT_num1	33.0523	9524.04	288.15	9524.04	288.15
FCLT_num2	35.8844	9524.04	265.409	9524.04	265.409
FCLT_num3	93.5084	9524.04	101.852	9524.04	101.852
HBZOPT	32.5118	9461.04	291.003	9461.04	291.003
PNTK	72.7196	972	13.3664	972	13.3664
DPCOAK	22.6217	2304	101.849	2304	101.849
HETZK	54.6783	11542.8	211.103	11542.8	211.103
KDOPS	123.331	2592	21.0166	2592	21.0166
KDOPP	79.9884	36000	450.065	36000	450.065
AST	38.4559	24033.1	624.951	24033.1	624.951
SGDS	35.8002	76498.5	2136.82	76498.5	2136.82
CYNTAH	170.488	18024.1	105.721	18024.1	105.721
GSPMDA	141.064	57857.7	410.152	57857.7	410.152
GSPMDS	141.064	48666.4	344.995	48666.4	344.995
GUAD	50.2442	142272	2831.6	142272	2831.6
TMAOR1_num1	144.094	100064	694.436	100064	694.436
TMAOR1_num2	233.042	100064	429.38	100064	429.38
TMAOR2	144.094	42205.2	292.901	42205.2	292.901
DGK1	47.1854	9898.29	209.774	9898.29	209.774
DTMPK	23.7831	64800	2724.62	64800	2724.62
NDPK1_num1	23.586	22045.9	934.703	22045.9	934.703
NDPK1_num2	61.8538	22045.9	356.42	22045.9	356.42
TRDR_num1	81.0527	36024.4	444.457	36024.4	444.457
TRDR_num2	84.8008	36024.4	424.813	36024.4	424.813
PGMT_num1	58.361	111559	1911.53	111559	1911.53
PGMT_num2	20.7798	111559	5368.62	111559	5368.62
PGMT_num3	23.5649	111559	4734.11	111559	4734.11
FRUK	67.5114	65166.2	965.261	65166.2	965.261
RHCCE	19.4162	10.8	0.556237	10.8	0.556237
KG6PDC_num1	47.1562	21707.2	460.325	21707.2	460.325
KG6PDC_num2	23.4448	21707.2	925.885	21707.2	925.885
X5PL3E_num1	32.0066	240986	7529.26	240986	7529.26
X5PL3E_num2	32.4552	240986	7425.19	240986	7425.19
DOGULNR	73.1454	22733.6	310.8	22733.6	310.8
BETALDHx	211.644	18043.4	85.2532	18043.4	85.2532
BETALDHy	211.644	21034.5	99.386	21034.5	99.386
MLTG3	69.041	48889.5	708.122	48889.5	708.122
DKGLCNR1_num1	31.1096	10057.9	323.306	10057.9	323.306
DKGLCNR1_num2	29.4368	10057.9	341.679	10057.9	341.679
NADTRHD	412.483	94594.5	229.329	94594.5	229.329
FMNRx2_num1	42.5067	17654.5	415.333	17654.5	415.333
FMNRx2_num2	26.242	17654.5	672.756	17654.5	672.756
FMNRx2_num3	530.159	17654.5	33.3003	17654.5	33.3003
ACPS1_num1	28.1046	21613.7	769.044	21613.7	769.044
ACPS1_num2	21.7678	21613.7	992.92	21613.7	992.92
GMPS2	117.358	18000	153.376	18000	153.376
AMPN	323.969	22311.6	68.8694	22311.6	68.8694
GSNK	96.8976	69004.4	712.138	69004.4	712.138
ADCS	71.7414	9527.58	132.804	9527.58	132.804
ADCL_num1	59.4301	5040	84.8055	5040	84.8055
ADCL_num2	18.7769	5040	268.415	5040	268.415
DHAPT	360.834	81935.1	227.071	81935.1	227.071
UMPK_num1	24.7463	42025	1698.23	42025	1698.23
UMPK_num2	155.822	42025	269.7	42025	269.7
DDPGALA	21.3906	25821.7	1207.15	25821.7	1207.15
DURIK1	23.4566	13012.2	554.736	13012.2	554.736
UPPRT	67.5998	10152.7	150.189	10152.7	150.189
CTPS2	241.497	39600	163.977	39600	163.977
NTD1_num1	45.4161	18381.7	404.741	18381.7	404.741
NTD1_num2	26.9004	18381.7	683.326	18381.7	683.326
NTD1_num3	25.3006	18381.7	726.534	18381.7	726.534
NTD1_num4	20.2554	18381.7	907.498	18381.7	907.498
NTD7_num1	25.3988	9716.83	382.57	9716.83	382.57
NTD7_num2	26.9004	9716.83	361.215	9716.83	361.215
NTD7_num3	20.2554	9716.83	479.716	9716.83	479.716
NTD7_num4	27.1631	9716.83	357.722	9716.83	357.722
PAPPT3	39.8748	252000	6319.78	252000	6319.78
UAGPT3	37.8147	61200	1618.42	61200	1618.42
F6PA_num1	229.968	67194.1	292.189	67194.1	292.189
F6PA_num2	23.5552	67194.1	2852.62	67194.1	2852.62
AGMHE	174.466	38346.4	219.793	38346.4	219.793
GMHEPAT	102.101	348334	3411.66	348334	3411.66
IDOND	37.1466	19621.4	528.214	19621.4	528.214
IDOND2	37.1466	9973.97	268.503	9973.97	268.503
GLYCLTDx_num1	70.791	20514.7	289.792	20514.7	289.792
GLYCLTDx_num2	35.3434	20514.7	580.439	20514.7	580.439
HPYRRy_num1	35.3434	9598.25	271.571	9598.25	271.571
HPYRRy_num2	70.791	9598.25	135.586	9598.25	135.586
ACODA	84.6947	93600	1105.15	93600	1105.15
ADA	36.3975	38158	1048.37	38158	1048.37
DADA	36.3975	37137.1	1020.32	37137.1	1020.32
ADD	127.479	96905.2	760.168	96905.2	760.168
ADSS	94.6899	11880	125.462	11880	125.462
AGDC	163.796	112916	689.371	112916	689.371
ASNN_num1	148.509	12284.9	82.7216	12284.9	82.7216
ASNN_num2	33.394	12284.9	367.878	12284.9	367.878
ASNS2_num1	73.3011	68400	933.137	68400	933.137
ASNS2_num2	125.318	68400	545.811	68400	545.811
ASPCT_num1	309.288	34791.9	112.49	34791.9	112.49
ASPCT_num2	206.564	34791.9	168.431	34791.9	168.431
DMPPS	69.5491	396	5.69382	396	5.69382
MCOATA	41.0567	17706.5	431.27	17706.5	431.27
IPDPS	69.5491	3096	44.5153	3096	44.5153
DAPE	60.4171	302400	5005.21	302400	5005.21
DHDPRy	115.026	50400	438.16	50400	438.16
HSK	67.2473	291600	4336.23	291600	4336.23
SDPTA_num1	91.5493	17299.5	188.963	17299.5	188.963
SDPTA_num2	44.7291	17299.5	386.761	17299.5	386.761
SDPTA_num3	87.5339	17299.5	197.632	17299.5	197.632
SDPTA_num4	87.3307	17299.5	198.091	17299.5	198.091
SDPTA_num5	79.5666	17299.5	217.421	17299.5	217.421
THRS	47.1138	14400	305.643	14400	305.643
HSST	71.4546	28800	403.053	28800	403.053
PPNDH	86.2227	43200	501.028	43200	501.028
DDPA_num1	152.038	140720	925.557	140720	925.557
DDPA_num2	77.6079	140720	1813.22	140720	1813.22
DDPA_num3	77.4701	140720	1816.44	140720	1816.44
NMNDA	35.1634	23640.8	672.314	23640.8	672.314
NNAM	23.362	11380.5	487.137	11380.5	487.137
P5CD	287.63	176721	614.405	176721	614.405
SPMDAT1	87.548	32401.7	370.102	32401.7	370.102
SPMDAT2	87.548	18678.3	213.349	18678.3	213.349
TDPADGAT	24.2204	27137.5	1120.44	27137.5	1120.44
MALS_num1	60.2736	84473.1	1401.49	84473.1	1401.49
MALS_num2	80.4885	84473.1	1049.51	84473.1	1049.51
TRE6PP	29.1753	9577.3	328.267	9577.3	328.267
ADPRDP_num1	42.3063	13031.1	308.018	13031.1	308.018
ADPRDP_num2	47.3336	13031.1	275.303	13031.1	275.303
ARAI	336.444	46558	138.383	46558	138.383
M1PD	41.139	21414.1	520.529	21414.1	520.529
G3PD2	72.7232	68644.2	943.911	68644.2	943.911
GALS3	101.314	27314.3	269.6	27314.3	269.6
FCI	389.86	38459.2	98.6488	38459.2	98.6488
FCLK	52.2587	68205.7	1305.15	68205.7	1305.15
FCLPA_num1	23.2225	24648.8	1061.42	24648.8	1061.42
FCLPA_num2	95.1013	24648.8	259.185	24648.8	259.185
ACCOAL_num1	72.0936	16156.3	224.102	16156.3	224.102
ACCOAL_num2	69.3509	16156.3	232.965	16156.3	232.965
GALUi	131.769	10809.6	82.0343	10809.6	82.0343
U23GAAT	108.115	129600	1198.72	129600	1198.72
UAAGDS	53.3436	28800	539.896	28800	539.896
UAMAS	107.252	50400	469.922	50400	469.922
UAMAGS	46.9736	104400	2222.52	104400	2222.52
UGLYCH	18.1696	91417.3	5031.33	91417.3	5031.33
OP4ENH	144.449	26173.2	181.193	26173.2	181.193
HOPNTAL	36.4704	50874.6	1394.96	50874.6	1394.96
3HPPPNH	62.1857	16534.7	265.892	16534.7	265.892
AKGDH	2418.39	112697	46.6002	3596400	1487.1
HPYRRx_num1	35.3434	16797	475.252	16797	475.252
HPYRRx_num2	70.791	16797	237.276	16797	237.276
GLYCDx	309.698	19473.2	62.878	19473.2	62.878
ASP1DC	13.8337	252	18.2164	252	18.2164
UGMDDS	47.4472	57600	1213.98	57600	1213.98
UHGADA	33.9559	75600	2226.42	75600	2226.42
UAGAAT	92.8795	17547.9	188.932	17547.9	188.932
ATPPRT	66.7334	7920	118.681	7920	118.681
HISTD	92.2207	11160	121.014	11160	121.014
IGPDH	80.5559	13680	169.82	13680	169.82
PRPPS	34.2183	28800	841.655	28800	841.655
PRATPP	22.7558	79200	3480.43	79200	3480.43
PRMICI	26.0326	36000	1382.88	36000	1382.88
SERAT	175.9	136800	777.715	136800	777.715
CYSS_num1	65.3283	47534.8	727.63	47534.8	727.63
CYSS_num2	68.9793	47534.8	689.117	47534.8	689.117
BPNT	27.1759	79200	2914.35	79200	2914.35
PAPSR_num1	71.5064	32950.3	460.803	32950.3	460.803
PAPSR_num2	67.7583	32950.3	486.292	32950.3	486.292
ASPK_num1	177.775	631361	3551.45	631361	3551.45
ASPK_num2	356.481	631361	1771.09	631361	1771.09
ASPK_num3	97.0635	631361	6504.62	631361	6504.62
ASAD	80.0358	29917.3	373.799	29917.3	373.799
DAPDC	92.3545	144000	1559.21	144000	1559.21
METAT	167.806	21.6	0.12872	27000	160.9
ASCBPL	240.364	38846.8	161.616	38846.8	161.616
ACBIPGT	40.328	9379.71	232.586	9379.71	232.586
ADOCBLS	26.3856	10036	380.358	10036	380.358
ADOCBIK	40.328	9323.06	231.181	9323.06	231.181
TMPK	35.0708	828	23.6094	828	23.6094
HPPPNDO	136.784	35492.1	259.475	35492.1	259.475
DHCINDO	136.784	19495.6	142.528	19495.6	142.528
HKNDDH	63.8749	38363.6	600.605	38363.6	600.605
HKNTDH	63.8749	18327.3	286.925	18327.3	286.925
GLYCK2	39.1043	61745.3	1578.99	61745.3	1578.99
ENTCS	23.2586	10772.5	463.163	10772.5	463.163
SULR	786.151	71599.2	91.0756	71599.2	91.0756
MANPGH	100.015	80637.6	806.255	80637.6	806.255
URDGLYCD	75.9342	10345.5	136.243	10345.5	136.243
CBMKr	31.6441	37048.8	1170.8	37048.8	1170.8
AMANAPEr	24.0737	25940	1077.53	25940	1077.53
ACM6PH	62.4398	12910.9	206.773	12910.9	206.773
NNATr	24.528	15120	616.438	15120	616.438
CYTDH_num1	33.8229	23757.9	702.42	23757.9	702.42
CYTDH_num2	134.992	23757.9	175.995	23757.9	175.995
CYTDH_num3	32.5608	23757.9	729.647	23757.9	729.647
PSERT	79.5666	29880	375.534	29880	375.534
AIRC2	78.9222	554400	7024.64	554400	7024.64
GAPD	142.13	104400	734.539	3596400	25303.6
HEX1	34.7231	47562.9	1369.78	47562.9	1369.78
GND	102.963	79200	769.211	1170000	11363.3
TAUDO	129.638	9422.36	72.682	9422.36	72.682
ME2	494.504	502505	1016.18	502505	1016.18
ARGSL	50.3182	39600	786.992	39600	786.992
CBPS	318.546	12764.7	40.0717	12764.7	40.0717
GLU5K	156.226	90000	576.088	90000	576.088
IPPS	57.2979	36000	628.295	36000	628.295
ACOATA	75.6698	32149.4	424.864	32149.4	424.864
MLTG2	69.041	44577.3	645.664	44577.3	645.664
MLTG1	69.041	64611.2	935.838	64611.2	935.838
AMALT3	78.5035	26398.1	336.266	26398.1	336.266
MLTP3	181.045	21419.8	118.312	21419.8	118.312
SPODM_num1	46.1942	43146.1	934.015	43146.1	934.015
SPODM_num2	42.5316	43146.1	1014.45	43146.1	1014.45
AHCYSNS	48.7079	108	2.2173	108	2.2173
TMK	32.3973	9301.68	287.113	9301.68	287.113
NTPP4_num1	15.0461	9555.08	635.054	9555.08	635.054
NTPP4_num2	60.8246	9555.08	157.092	9555.08	157.092
NTPP3_num1	60.8246	50618.5	832.204	50618.5	832.204
NTPP3_num2	16.3707	50618.5	3092.02	50618.5	3092.02
NTPP3_num3	15.0461	50618.5	3364.23	50618.5	3364.23
NTPP6_num1	60.8246	10261.7	168.709	10261.7	168.709
NTPP6_num2	65.6516	10261.7	156.305	10261.7	156.305
NTPP7_num1	16.3707	9517.85	581.396	9517.85	581.396
NTPP7_num2	60.8246	9517.85	156.48	9517.85	156.48
NTPP7_num3	43.0309	9517.85	221.186	9517.85	221.186
NTPP8_num1	60.8246	9521.2	156.535	9521.2	156.535
NTPP8_num2	43.0309	9521.2	221.264	9521.2	221.264
P5CR	281.449	115200	409.311	115200	409.311
CYANST_num1	37.2775	331772	8900.06	331772	8900.06
CYANST_num2	24.1649	331772	13729.5	331772	13729.5
CYANST_num3	30.8118	331772	10767.7	331772	10767.7
DHPPDA2	80.6766	1152	14.2792	1152	14.2792
GMAND	84.0937	18347.7	218.181	18347.7	218.181
PPCSCT	53.8244	15747.7	292.575	15747.7	292.575
CYTD	63.0797	65944.4	1045.41	65944.4	1045.41
DCYTD	63.0797	58808.6	932.291	58808.6	932.291
DBTS	48.2792	1.8	0.0372831	1.8	0.0372831
DCTPD	63.7478	10867.2	170.471	10867.2	170.471
DHDPS	125.08	39600	316.598	39600	316.598
G1PACT	147.57	57600	390.323	57600	390.323
GART	42.4337	432	10.1806	432	10.1806
CSND	285.546	15341.8	53.728	15341.8	53.728
GF6PTA	133.789	7920	59.1978	7920	59.1978
GLUCYS	58.2693	24739	424.564	24739	424.564
GLUN_num1	131.613	43731.7	332.274	43731.7	332.274
GLUN_num2	67.0312	43731.7	652.409	43731.7	652.409
GLUPRT	225.952	219600	971.887	219600	971.887
GMPR	149.535	11043.4	73.852	11043.4	73.852
NADS1	61.2737	180	2.93764	180	2.93764
NTRIR2x	105.405	194253	1842.92	194253	1842.92
OCBT_num1	110.721	45832.3	413.943	45832.3	413.943
OCBT_num2	110.481	45832.3	414.842	45832.3	414.842
GARFT	23.2383	403200	17350.7	403200	17350.7
GPDDA1	27.4096	10438.4	380.829	10438.4	380.829
GPDDA2	27.4096	9300.3	339.308	9300.3	339.308
PHETA1_num1	87.1467	163145	1872.07	163145	1872.07
PHETA1_num2	87.0756	163145	1873.6	163145	1873.6
PHETA1_num3	204.562	163145	797.533	163145	797.533
PPND	84.085	79200	941.904	79200	941.904
TRPS1	143.414	10429.4	72.722	10429.4	72.722
PRAMPC	22.7558	79200	3480.43	79200	3480.43
MCITL2	128.539	38608.8	300.368	38608.8	300.368
DXYLK	105.237	37749	358.706	37749	358.706
MDH3	60.2296	139494	2316.04	139494	2316.04
SOTA	87.3307	24429.9	279.74	24429.9	279.74
SGSAD	53.0263	28118.2	530.269	28118.2	530.269
PTA2	463.033	89932.1	194.224	89932.1	194.224
MDH2	60.2296	42664.6	708.367	42664.6	708.367
ACOTA_num1	91.5493	17996.4	196.576	17996.4	196.576
ACOTA_num2	87.3307	17996.4	206.072	17996.4	206.072
ACOTA_num3	87.5339	17996.4	205.593	17996.4	205.593
ACOTA_num4	44.7291	17996.4	402.342	17996.4	402.342
GPDDA5	27.4096	10984.7	400.761	10984.7	400.761
PDX5PS	281.302	9443.53	33.5708	9443.53	33.5708
PPBNGS	284.998	864	3.0316	864	3.0316
PPNCL2	521.258	540	1.03596	540	1.03596
PRAGSr	45.9404	72000	1567.25	72000	1567.25
PRFGS	141.403	50400	356.429	50400	356.429
ETHAAL	487.108	71428.1	146.637	71428.1	146.637
MAN1PT2	53.0163	174022	3282.42	174022	3282.42
AP4AH	31.2967	77148.7	2465.08	77148.7	2465.08
AP5AH	31.2967	42259.3	1350.28	42259.3	1350.28
ADNCYC	97.586	31838.4	326.26	31838.4	326.26
MI1PP	29.1721	404041	13850.3	404041	13850.3
MCITS	86.2044	35244.9	408.853	35244.9	408.853
PPAKr	43.3841	12000.4	276.608	12000.4	276.608
NTP3_num1	68.8674	24885.9	361.359	24885.9	361.359
NTP3_num2	36.7039	24885.9	678.017	24885.9	678.017
NTP3_num3	35.6597	24885.9	697.871	24885.9	697.871
NTP3_num4	39.1933	24885.9	634.952	24885.9	634.952
NTP3_num5	31.565	24885.9	788.4	24885.9	788.4
NTP3_num6	36.1132	24885.9	689.107	24885.9	689.107
NTP3_num7	48.3271	24885.9	514.946	24885.9	514.946
PPM2	44.37	146884	3310.44	146884	3310.44
MOAT2	47.2911	212400	4491.33	212400	4491.33
G6PDH2r	55.7044	558000	10017.2	558000	10017.2
NADH5_num1	40.7511	19112	468.993	19112	468.993
NADH5_num2	47.3587	19112	403.558	19112	403.558
NADH5_num3	40.34	19112	473.772	19112	473.772
NADH5_num4	83.3822	19112	229.209	19112	229.209
MOHMT	282.374	36	0.12749	36	0.12749
GMPS	117.358	24356.9	207.543	24356.9	207.543
UDPGD	87.3138	49328.3	564.954	49328.3	564.954
GLCRD_num1	48.8496	16806.8	344.052	16806.8	344.052
GLCRD_num2	49.141	16806.8	342.011	16806.8	342.011
PPPNDO	126.995	20380.6	160.483	20380.6	160.483
CHRPL_num1	18.7769	828	44.0967	828	44.0967
CHRPL_num2	59.4301	828	13.9323	828	13.9323
TDPAGTA	167.604	14344.1	85.5835	14344.1	85.5835
UACMAMO	91.6775	34516.7	376.502	34516.7	376.502
FBA3	78.2945	14400	183.921	14400	183.921
PMPK	114.534	1800	15.7158	1800	15.7158
LCADi	209.091	22726.5	108.692	22726.5	108.692
ADK3	23.586	10021	424.871	10021	424.871
GLUDC_num1	316.111	63196.4	199.918	63196.4	199.918
GLUDC_num2	316.009	63196.4	199.983	63196.4	199.983
BSORy	85.8507	52283	608.999	52283	608.999
ADSK	44.6426	79200	1774.09	79200	1774.09
HSDy_num1	177.775	70415	396.09	70415	396.09
HSDy_num2	356.481	70415	197.528	70415	197.528
CYSTL_num1	172.85	16792.1	97.149	16792.1	97.149
CYSTL_num2	87.2837	16792.1	192.386	16792.1	192.386
SHSL1	166.202	36000	216.604	36000	216.604
SSALy_num1	99.4357	30829.9	310.049	30829.9	310.049
SSALy_num2	206.88	30829.9	149.023	30829.9	149.023
3HCINNMH	62.1857	13931.5	224.03	13931.5	224.03
BSORx	85.8507	11186.8	130.305	11186.8	130.305
FACOAL160t2pp_num1	60.7731	20734.3	341.176	20734.3	341.176
FACOAL160t2pp_num2	124.664	20734.3	166.322	20734.3	166.322
FACOAL180t2pp_num1	60.7731	19696.9	324.106	19696.9	324.106
FACOAL180t2pp_num2	124.664	19696.9	158	19696.9	158
SPODMpp	17.681	10789.9	610.254	10789.9	610.254
NO3R1bpp	189.237	174654	922.934	174654	922.934
PHYTSpp	94.1137	38198.7	405.878	38198.7	405.878
PPTHpp	98.8772	6.1608e+06	62307.6	6.1608e+06	62307.6
NO3R2pp_num1	250.963	1.54793e+06	6167.95	1.54793e+06	6167.95
NO3R2pp_num2	474.555	1.54793e+06	3261.85	1.54793e+06	3261.85
NTP3pp	94.1137	9514.25	101.093	9514.25	101.093
NO3R2bpp	132.439	22948.3	173.274	22948.3	173.274
THD2pp	206.693	2.17133e+06	10505.1	2.17133e+06	10505.1
TMAOR1pp_num1	138.062	26365.1	190.965	26365.1	190.965
TMAOR1pp_num2	129.25	26365.1	203.985	26365.1	203.985
TMAOR2pp_num1	138.062	18727.9	135.648	18727.9	135.648
TMAOR2pp_num2	129.25	18727.9	144.896	18727.9	144.896
ACACT7r_num1	46.5305	36389.7	782.062	36389.7	782.062
ACACT7r_num2	81.7524	36389.7	445.121	36389.7	445.121
PSP_L	35.0427	5331600	152146	5331600	152146
ACACT2r_num1	46.5305	45028	967.71	45028	967.71
ACACT2r_num2	81.7524	45028	550.785	45028	550.785
ACACT3r_num1	46.5305	35394.2	760.666	35394.2	760.666
ACACT3r_num2	81.7524	35394.2	432.944	35394.2	432.944
ACACT4r_num1	46.5305	41966.5	901.915	41966.5	901.915
ACACT4r_num2	81.7524	41966.5	513.337	41966.5	513.337
AHGDx	176.703	23135.5	130.928	23135.5	130.928
GTPCI	248.306	28.8	0.115986	28.8	0.115986
FDMO	166.945	9726.12	58.2594	9726.12	58.2594
CHOLD	61.8776	32331.6	522.509	32331.6	522.509
DRPA	27.7338	57740	2081.94	57740	2081.94
TKT2_num1	144.423	324066	2243.86	324066	2243.86
TKT2_num2	73.0427	324066	4436.66	324066	4436.66
DMSOR1pp	129.25	32437.3	250.965	32437.3	250.965
NTD8pp_num1	104.414	15863.7	151.931	15863.7	151.931
NTD8pp_num2	60.824	15863.7	260.814	15863.7	260.814
TREHpp	63.6367	42399.8	666.279	42399.8	666.279
CYTBDpp_num1	100.344	49127.8	489.596	49127.8	489.596
CYTBDpp_num2	104.7	49127.8	469.225	49127.8	469.225
CYTBD2pp	100.344	28476.7	283.792	28476.7	283.792
ATPS4rpp_num1	543.644	6.75483e+06	12425.1	6.75483e+06	12425.1
ATPS4rpp_num2	530.013	6.75483e+06	12744.7	6.75483e+06	12744.7
ECOAH8_num1	77.0722	18863	244.745	18863	244.745
ECOAH8_num2	159.188	18863	118.495	18863	118.495
GLCDpp_num1	86.7474	43571.8	502.284	43571.8	502.284
GLCDpp_num2	41.0545	43571.8	1061.32	43571.8	1061.32
HYD2pp_num1	482.933	7.21062e+06	14930.9	7.21062e+06	14930.9
HYD2pp_num2	181.748	7.21062e+06	39673.7	7.21062e+06	39673.7
ECOAH5_num1	77.0722	45024.4	584.185	45024.4	584.185
ECOAH5_num2	159.188	45024.4	282.838	45024.4	282.838
DHFS	45.4057	828	18.2356	828	18.2356
ACGAMK	33.0427	21792.2	659.517	21792.2	659.517
METS_num1	135.997	1116	8.20606	1116	8.20606
METS_num2	84.6735	1116	13.18	3596400	42473.7
PRASCSi	80.985	12600	155.584	12600	155.584
TRSARr_num1	123.202	53910.3	437.575	53910.3	437.575
TRSARr_num2	30.4274	53910.3	1771.77	53910.3	1771.77
LYXI	188.798	47449	251.322	47449	251.322
URIH_num1	33.8229	12358.1	365.378	12358.1	365.378
URIH_num2	134.992	12358.1	91.5472	12358.1	91.5472
URIH_num3	32.5608	12358.1	379.541	12358.1	379.541
XTSNH	32.5608	482025	14803.8	482025	14803.8
INSH	32.5608	36111.2	1109.04	36111.2	1109.04
PPK2	160.863	39038	242.679	39038	242.679
MTHFR2	132.411	9720	73.4079	9720	73.4079
ASPO3	60.3374	10440.9	173.042	10440.9	173.042
ASPO5	60.3374	9646.31	159.873	9646.31	159.873
ASPO4	60.3374	9316.28	154.403	9316.28	154.403
ASPO6	60.3374	15120	250.591	15120	250.591
ACACT5r_num1	81.7524	48979.5	599.12	48979.5	599.12
ACACT5r_num2	46.5305	48979.5	1052.63	48979.5	1052.63
MALDDH	40.3149	21531.7	534.088	21531.7	534.088
DHPS2	61.2302	720	11.7589	720	11.7589
MTHFC	62.0875	248400	4000.81	248400	4000.81
MTHFD	62.0875	248400	4000.81	248400	4000.81
QULNS	76.4816	1656	21.6523	1656	21.6523
ALKP	20.7798	10071.4	484.671	10071.4	484.671
L_LACD3_num1	104.269	61053	585.535	61053	585.535
L_LACD3_num2	42.7282	61053	1428.87	61053	1428.87
L_LACD2_num1	104.269	93550.1	897.201	93550.1	897.201
L_LACD2_num2	42.7282	93550.1	2189.42	93550.1	2189.42
ACACT6r_num1	46.5305	40632.8	873.251	40632.8	873.251
ACACT6r_num2	81.7524	40632.8	497.023	40632.8	497.023
GLCTR1	42.2841	19616	463.908	19616	463.908
LIPAabcpp	128.921	14115.5	109.49	14115.5	109.49
LIPACabcpp	128.921	10250.9	79.5129	10250.9	79.5129
GGGABADr	53.4186	20624.6	386.094	20624.6	386.094
GLYOX3	62.3809	9301.15	149.103	9301.15	149.103
FDMO3	166.945	19785.6	118.515	19785.6	118.515
FDMO4	166.945	14910.8	89.3157	14910.8	89.3157
O16GLCT1	43.1882	28037.5	649.194	28037.5	649.194
O16AP2pp	81.199	12811.2	157.775	12811.2	157.775
O16AP3pp	81.199	16964.8	208.929	16964.8	208.929
O16A4Lpp	46.8777	21753	464.037	21753	464.037
MALTATr	60.288	33857.5	561.596	33857.5	561.596
ENTERES	45.6519	11061.2	242.294	11061.2	242.294
LADGMDH	53.116	25938.7	488.34	25938.7	488.34
ALAGLUE	34.674	73466.3	2118.77	73466.3	2118.77
GGGABAH	56.0261	5.81434e+06	103779	5.81434e+06	103779
FRULYSK	28.3318	26674.2	941.493	26674.2	941.493
FDMO6	166.945	9703.84	58.126	9703.84	58.126
CYANSTpp	11.4753	10162.3	885.576	10162.3	885.576
MCPST	30.8118	11568.7	375.465	11568.7	375.465
ECAP1pp	135.966	53500.3	393.483	53500.3	393.483
UDCPDPpp_num1	29.7588	22302.9	749.457	22302.9	749.457
UDCPDPpp_num2	29.0213	22302.9	768.502	22302.9	768.502
UDCPDPpp_num3	22.3986	22302.9	995.729	22302.9	995.729
ECAP2pp	135.966	113152	832.208	113152	832.208
ECA4OALpp	46.8777	9951.77	212.292	9951.77	212.292
FE3Ri	26.242	41567.6	1584.01	41567.6	1584.01
NODOy	43.8677	18722	426.783	18722	426.783
GALM2pp	38.1905	52658.4	1378.83	52658.4	1378.83
GLCTR3	39.0403	14212.7	364.053	14212.7	364.053
HEPT4	41.7295	66050.8	1582.83	66050.8	1582.83
LA4NTpp	62.5426	30335.1	485.031	30335.1	485.031
NODOx	43.8677	34540.5	787.379	34540.5	787.379
NHFRBO	258.34	76271.5	295.237	76271.5	295.237
42A12BOOXpp	168.757	12330	73.0633	12330	73.0633
TYROXDApp	168.757	12377	73.3422	12377	73.3422
NTRIR4pp	134.027	752249	5612.67	752249	5612.67
NTRIR3pp	134.027	1.0038e+06	7489.51	1.0038e+06	7489.51
AGM3PA	20.5362	24213.9	1179.09	24213.9	1179.09
ACANTHAT	64.5492	14042.6	217.549	14042.6	217.549
METSOXR1_num1	101.405	9516.1	93.8421	9516.1	93.8421
METSOXR1_num2	38.8698	9516.1	244.82	9516.1	244.82
METSOXR1_num3	35.1216	9516.1	270.947	9516.1	270.947
METSOXR1_num4	97.6573	9516.1	97.4438	9516.1	97.4438
METSOXR2_num1	48.0499	9462.18	196.924	9462.18	196.924
METSOXR2_num2	31.006	9462.18	305.173	9462.18	305.173
METSOXR2_num3	27.2578	9462.18	347.137	9462.18	347.137
METSOXR2_num4	51.798	9462.18	182.675	9462.18	182.675
DAPAL	86.6551	33933.6	391.594	33933.6	391.594
AMPTASECG_num1	277.081	81038.1	292.471	81038.1	292.471
AMPTASECG_num2	98.9189	81038.1	819.237	81038.1	819.237
AMPTASECG_num3	329.279	81038.1	246.108	81038.1	246.108
AMPTASECG_num4	105.831	81038.1	765.732	81038.1	765.732
LACZpp	83.46	21454.2	257.06	21454.2	257.06
GPDDA1pp	81.6867	37449.6	458.454	37449.6	458.454
GPDDA5pp	81.6867	28550.6	349.513	28550.6	349.513
FLVR_num1	26.242	11168.1	425.58	11168.1	425.58
FLVR_num2	786.151	11168.1	14.206	11168.1	14.206
FDMO2	166.945	9825.64	58.8555	9825.64	58.8555
LALGP	105.831	231021	2182.93	231021	2182.93
AGM4PApp_num1	31.4121	24410.5	777.105	24410.5	777.105
AGM4PApp_num2	45.6344	24410.5	534.915	24410.5	534.915
AGM4PApp_num3	47.9852	24410.5	508.709	24410.5	508.709
AGM4PApp_num4	31.0724	24410.5	785.601	24410.5	785.601
AGM4PA	20.5362	20099.4	978.732	20099.4	978.732
RNDR3b_num1	258.195	19613.3	75.9632	19613.3	75.9632
RNDR3b_num2	243.529	19613.3	80.5377	19613.3	80.5377
RNDR3b_num3	242.982	19613.3	80.7191	19613.3	80.7191
RNDR3b_num4	259.602	19613.3	75.5514	19613.3	75.5514
RNDR4b_num1	259.602	173714	669.155	173714	669.155
RNDR4b_num2	243.529	173714	713.318	173714	713.318
RNDR4b_num3	242.982	173714	714.925	173714	714.925
RNDR4b_num4	258.195	173714	672.802	173714	672.802
UDPGALPpp	60.824	15095.5	248.183	15095.5	248.183
UACGAMPpp	60.824	11672.6	191.907	11672.6	191.907
UACGALPpp	60.824	13846.9	227.655	13846.9	227.655
UGLCURPpp	60.824	14359.6	236.085	14359.6	236.085
FEROpp_num1	56.5562	9485.93	167.726	9485.93	167.726
FEROpp_num2	443.881	9485.93	21.3705	9485.93	21.3705
AM4PCP	33.5675	54473.4	1622.8	54473.4	1622.8
AM3PA	20.5362	9367.16	456.129	9367.16	456.129
UM4PCP	33.5675	9321.33	277.689	9321.33	277.689
CBLAT	21.9989	9949.38	452.267	9949.38	452.267
TDP	17.4329	157842	9054.23	157842	9054.23
3PEPTabcpp_num1	206.847	26082.6	126.096	26082.6	126.096
3PEPTabcpp_num2	200.751	26082.6	129.925	26082.6	129.925
3PEPTabcpp_num3	201.75	26082.6	129.282	26082.6	129.282
4PEPTabcpp_num1	201.75	49599.6	245.847	49599.6	245.847
4PEPTabcpp_num2	206.847	49599.6	239.789	49599.6	239.789
AGM3Pt2pp	53.2452	14196.2	266.619	14196.2	266.619
AGM4Pt2pp	53.2452	37678.1	707.634	37678.1	707.634
AGMt2pp	53.2452	34185.3	642.036	34185.3	642.036
FEOXAMR1	30.1128	26079.9	866.074	26079.9	866.074
FEOXAMR2	30.1128	10115.7	335.927	10115.7	335.927
FEOXAMR3	30.1128	57714.2	1916.6	57714.2	1916.6
PTHRpp_num1	104.414	21548.5	206.375	21548.5	206.375
PTHRpp_num2	98.8772	21548.5	217.932	21548.5	217.932
ARABDI	389.86	86322.6	221.42	86322.6	221.42
R5PPpp_num1	104.414	23570.5	225.74	23570.5	225.74
R5PPpp_num2	98.8772	23570.5	238.381	23570.5	238.381
PSP_Lpp_num1	104.414	23226.4	222.445	23226.4	222.445
PSP_Lpp_num2	98.8772	23226.4	234.901	23226.4	234.901
TYRPpp	104.414	9537.08	91.3389	9537.08	91.3389
PAPSR2_num1	80.3019	25460.2	317.057	25460.2	317.057
PAPSR2_num2	65.0891	25460.2	391.16	25460.2	391.16
PAPSR2_num3	65.6365	25460.2	387.898	25460.2	387.898
PAPSR2_num4	81.7092	25460.2	311.596	25460.2	311.596
GRXR_num1	25.7575	11950.3	463.953	11950.3	463.953
GRXR_num2	24.3502	11950.3	490.767	11950.3	490.767
GRXR_num3	9.1375	11950.3	1307.83	11950.3	1307.83
GRXR_num4	9.6849	11950.3	1233.91	11950.3	1233.91
RNDR1b_num1	243.529	22837.7	93.7779	22837.7	93.7779
RNDR1b_num2	258.195	22837.7	88.4513	22837.7	88.4513
RNDR1b_num3	242.982	22837.7	93.9891	22837.7	93.9891
RNDR1b_num4	259.602	22837.7	87.9718	22837.7	87.9718
RNDR2b_num1	259.602	27735	106.837	27735	106.837
RNDR2b_num2	243.529	27735	113.888	27735	113.888
RNDR2b_num3	258.195	27735	107.419	27735	107.419
RNDR2b_num4	242.982	27735	114.144	27735	114.144
FACOAE181	127.865	28297.7	221.309	28297.7	221.309
FACOAE160	127.865	129600	1013.57	129600	1013.57
FACOAE140	127.865	63347.8	495.426	63347.8	495.426
AAMYL	56.6394	23490.4	414.736	23490.4	414.736
AAMYLpp	75.7127	49598.1	655.083	49598.1	655.083
FACOAL80t2pp_num1	124.664	17459.3	140.051	17459.3	140.051
FACOAL80t2pp_num2	60.7731	17459.3	287.287	17459.3	287.287
PPGPPDP	79.3424	90720.8	1143.41	90720.8	1143.41
23PDE2pp	70.8322	52628.1	742.997	52628.1	742.997
23PDE4pp	70.8322	48310.7	682.044	48310.7	682.044
23PDE9pp	70.8322	43543.4	614.74	43543.4	614.74
SARCOX	40.902	18240.2	445.949	18240.2	445.949
MN6PP_num1	29.7211	11553	388.714	11553	388.714
MN6PP_num2	30.4128	11553	379.873	11553	379.873
MN6PP_num3	24.3302	11553	474.843	11553	474.843
MN6PP_num4	29.7077	11553	388.89	11553	388.89
3KGK	110.31	46839.3	424.616	46839.3	424.616
F6PP_num1	23.0075	18699	812.736	18699	812.736
F6PP_num2	29.7211	18699	629.15	18699	629.15
F6PP_num3	30.4128	18699	614.841	18699	614.841
F6PP_num4	20.7798	18699	899.866	18699	899.866
F6PP_num5	29.7077	18699	629.434	18699	629.434
GDPMNH	36.547	111348	3046.71	111348	3046.71
FACOAL60t2pp_num1	124.664	24310.9	195.011	24310.9	195.011
FACOAL60t2pp_num2	60.7731	24310.9	400.027	24310.9	400.027
GDPDPK_num1	83.8756	40330.4	480.836	40330.4	480.836
GDPDPK_num2	79.3424	40330.4	508.308	40330.4	508.308
R15BPK	20.7296	17862.2	861.676	17862.2	861.676
GGPTRCS	638.126	10428.4	16.3422	10428.4	16.3422
FRULYSDG	462.831	41650.6	89.9909	41650.6	89.9909
ASNNpp	147.403	56027.2	380.096	56027.2	380.096
GLUNpp	147.403	20661.1	140.167	20661.1	140.167
NTD12_num1	25.3988	9521.23	374.869	9521.23	374.869
NTD12_num2	26.9004	9521.23	353.944	9521.23	353.944
NTD12_num3	45.4161	9521.23	209.644	9521.23	209.644
NTD12_num4	20.2554	9521.23	470.059	9521.23	470.059
DNTPPA_num1	17.3058	9493.61	548.579	9493.61	548.579
DNTPPA_num2	14.9271	9493.61	635.998	9493.61	635.998
NTPP9	42.0777	219466	5215.74	219466	5215.74
NTPP10	42.0777	25719.4	611.236	25719.4	611.236
NTPP11	42.0777	9764.88	232.068	9764.88	232.068
NTD10pp_num1	104.414	16669.9	159.651	16669.9	159.651
NTD10pp_num2	60.824	16669.9	274.067	16669.9	274.067
NTD1pp_num1	60.824	18062.1	296.957	18062.1	296.957
NTD1pp_num2	104.414	18062.1	172.985	18062.1	172.985
NTD2pp_num1	60.824	28742.7	472.556	28742.7	472.556
NTD2pp_num2	104.414	28742.7	275.276	28742.7	275.276
NTD2pp_num3	98.8772	28742.7	290.691	28742.7	290.691
NTD3pp_num1	60.824	17056.3	280.421	17056.3	280.421
NTD3pp_num2	104.414	17056.3	163.352	17056.3	163.352
NTD4pp_num1	104.414	16503.4	158.057	16503.4	158.057
NTD4pp_num2	60.824	16503.4	271.331	16503.4	271.331
NTD4pp_num3	98.8772	16503.4	166.908	16503.4	166.908
NTD5pp_num1	104.414	18932.1	181.317	18932.1	181.317
NTD5pp_num2	60.824	18932.1	311.26	18932.1	311.26
NTD6pp_num1	60.824	18118.8	297.89	18118.8	297.89
NTD6pp_num2	104.414	18118.8	173.529	18118.8	173.529
NTD7pp_num1	104.414	16283.3	155.949	16283.3	155.949
NTD7pp_num2	60.824	16283.3	267.712	16283.3	267.712
NTD7pp_num3	98.8772	16283.3	164.682	16283.3	164.682
NTD9pp_num1	104.414	17969.3	172.096	17969.3	172.096
NTD9pp_num2	60.824	17969.3	295.43	17969.3	295.43
NTD9pp_num3	98.8772	17969.3	181.733	17969.3	181.733
PEAMNOpp	168.757	25100	148.734	25100	148.734
GAL1PPpp	91.3658	49931.6	546.503	49931.6	546.503
ARGDCpp	295.594	11541.5	39.0451	11541.5	39.0451
ALLPI	32.1466	19201.3	597.305	19201.3	597.305
ALLK	33.8209	23208.9	686.228	23208.9	686.228
ALLULPE	26.1092	28398	1087.66	28398	1087.66
FACOAL100t2pp_num1	124.664	19405.1	155.659	19405.1	155.659
FACOAL100t2pp_num2	60.7731	19405.1	319.303	19405.1	319.303
GPDDA3pp	81.6867	36706.1	449.352	36706.1	449.352
GPDDA4pp	81.6867	41144.3	503.684	41144.3	503.684
GPDDA2pp	81.6867	41162.3	503.904	41162.3	503.904
FACOAL120t2pp_num1	60.7731	19622.6	322.882	19622.6	322.882
FACOAL120t2pp_num2	124.664	19622.6	157.404	19622.6	157.404
FACOAL140t2pp_num1	60.7731	15392.8	253.283	15392.8	253.283
FACOAL140t2pp_num2	124.664	15392.8	123.474	15392.8	123.474
HCYSMT2	33.4228	9603.53	287.335	9603.53	287.335
ACGK	54.3191	30240	556.71	30240	556.71
DHPTPE	112.656	17760	157.647	17760	157.647
NADPHQR2	43.7818	27721.1	633.164	27721.1	633.164
NADPHQR3	43.7818	30528.3	697.283	30528.3	697.283
NADPHQR4	43.7818	16810	383.948	16810	383.948
GLBRAN2	84.3369	221257	2623.48	221257	2623.48
ASR	40.2035	16666.6	414.555	16666.6	414.555
ECAtpp	44.9597	86843.6	1931.59	86843.6	1931.59
O16AT	21.6751	23247.2	1072.53	23247.2	1072.53
O16GALFT	37.7572	22063.8	584.359	22063.8	584.359
O16AUNDtpp	45.3826	56567	1246.45	56567	1246.45
O16AP1pp	81.199	18394.4	226.535	18394.4	226.535
AGM4PCP	33.5675	46441.4	1383.52	46441.4	1383.52
4PCP	33.5675	27706.2	825.387	27706.2	825.387
4PCPpp	21.0399	37289.8	1772.34	37289.8	1772.34
FALDH2	78.718	29317.3	372.434	29317.3	372.434
CBIAT	21.9989	17689.5	804.107	17689.5	804.107
PPDOy	37.9784	27609.9	726.99	27609.9	726.99
NTD12pp_num1	60.824	17007.5	279.619	17007.5	279.619
NTD12pp_num2	104.414	17007.5	162.885	17007.5	162.885
PPA2_num1	116.272	9737.92	83.7513	9737.92	83.7513
PPA2_num2	26.9004	9737.92	361.999	9737.92	361.999
3NTD7pp_num1	70.8322	55966.4	790.127	55966.4	790.127
3NTD7pp_num2	98.8772	55966.4	566.02	55966.4	566.02
3NTD4pp_num1	98.8772	46917.6	474.503	46917.6	474.503
3NTD4pp_num2	70.8322	46917.6	662.376	46917.6	662.376
3NTD4pp_num3	98.8772	46917.6	474.503	46917.6	474.503
3NTD2pp_num1	70.8322	44836.5	632.996	44836.5	632.996
3NTD2pp_num2	98.8772	44836.5	453.456	44836.5	453.456
3NTD9pp_num1	70.8322	39469.6	557.227	39469.6	557.227
3NTD9pp_num2	98.8772	39469.6	399.178	39469.6	399.178
23PDE7pp	70.8322	57434.7	810.855	57434.7	810.855
HSTPT	78.7203	11880	150.914	11880	150.914
THDPS	59.7842	8640	144.52	8640	144.52
ACONMT	29.006	176845	6096.85	176845	6096.85
GNK_num1	39.0866	26755	684.505	26755	684.505
GNK_num2	21.004	26755	1273.8	26755	1273.8
HMBS	33.8518	468	13.825	468	13.825
RMK	54.069	33913	627.216	33913	627.216
FHL_num1	467.425	166094	355.339	166094	355.339
FHL_num2	311.492	166094	533.22	166094	533.22
MEPCT	51.4745	12960	251.775	12960	251.775
GLUDy	291.488	180118	617.925	180118	617.925
GLYCLTDy_num1	35.3434	62636.4	1772.22	62636.4	1772.22
GLYCLTDy_num2	70.791	62636.4	884.808	62636.4	884.808
LYSDC_num1	805.903	11370.9	14.1095	11370.9	14.1095
LYSDC_num2	812.601	11370.9	13.9932	11370.9	13.9932
DAAD	95.2146	27473	288.538	27473	288.538
NTPP5_num1	17.3058	21294.6	1230.49	21294.6	1230.49
NTPP5_num2	60.8246	21294.6	350.098	21294.6	350.098
NTD3_num1	45.4161	11259.3	247.914	11259.3	247.914
NTD3_num2	26.9004	11259.3	418.555	11259.3	418.555
NTD3_num3	20.2554	11259.3	555.866	11259.3	555.866
GLYOX	28.4344	10623	373.597	10623	373.597
MTRPOX	40.902	11031.9	269.715	11031.9	269.715
AGM4PCPpp	21.0399	34105	1620.97	34105	1620.97
GTPDPDP	109.742	11616.7	105.854	11616.7	105.854
RNDR2_num1	270.392	10997.8	40.6738	10997.8	40.6738
RNDR2_num2	274.14	10997.8	40.1176	10997.8	40.1176
XAND	129.799	65517.6	504.761	65517.6	504.761
HACD3_num1	159.188	39593.5	248.722	39593.5	248.722
HACD3_num2	77.0722	39593.5	513.719	39593.5	513.719
NNDMBRT	73.974	31557.1	426.597	31557.1	426.597
THRA2_num1	90.6332	17869.5	197.163	17869.5	197.163
THRA2_num2	145.979	17869.5	122.411	17869.5	122.411
PPK	160.863	29958.5	186.236	29958.5	186.236
ABUTD	203.32	38704	190.36	38704	190.36
E4PD_num1	149.198	9322.45	62.4839	9322.45	62.4839
E4PD_num2	142.13	9322.45	65.591	9322.45	65.591
IG3PS	50.1073	32266.5	643.949	32266.5	643.949
DADK	23.586	15176.9	643.469	15176.9	643.469
DUTPDP_num1	48.4664	13212	272.601	13212	272.601
DUTPDP_num2	16.3707	13212	807.05	13212	807.05
NTP5	39.1933	30671.5	782.57	30671.5	782.57
MTAN	48.7079	9431.4	193.632	9431.4	193.632
DPR_num1	33.8708	9584.98	282.987	9584.98	282.987
DPR_num2	216.276	9584.98	44.3183	9584.98	44.3183
THRD_L_num1	224.781	57035.5	253.738	57035.5	253.738
THRD_L_num2	140.93	57035.5	404.709	57035.5	404.709
NAMNPP	45.8973	9308.7	202.816	9308.7	202.816
SELNPS	73.3745	91807.9	1251.22	91807.9	1251.22
CRNCAR	28.1902	203054	7203	203054	7203
ANHMK	39.4963	21853	553.292	21853	553.292
DHFR_num1	26.3483	17578.9	667.174	17578.9	667.174
DHFR_num2	17.9994	17578.9	976.638	17578.9	976.638
PRAIi	49.4923	18000	363.693	18000	363.693
TYRTA_num1	87.1467	69548	798.056	69548	798.056
TYRTA_num2	87.0756	69548	798.708	69548	798.708
TYRTA_num3	204.562	69548	339.985	69548	339.985
SHKK_num1	19.538	61262.2	3135.54	61262.2	3135.54
SHKK_num2	19.1508	61262.2	3198.93	61262.2	3198.93
SADH	98.5971	62717.1	636.094	62717.1	636.094
GLUSy	861.249	135502	157.332	135502	157.332
GUAPRT_num1	80.461	17179.2	213.51	17179.2	213.51
GUAPRT_num2	67.8824	17179.2	253.073	17179.2	253.073
PDH	4586.61	270262	58.924	3596400	784.108
DMSOR2pp	129.25	79462.9	614.798	79462.9	614.798
HYD3pp_num1	482.933	29006	60.062	29006	60.062
HYD3pp_num2	181.748	29006	159.594	29006	159.594
NO3R1pp_num1	250.963	401469	1599.71	401469	1599.71
NO3R1pp_num2	474.555	401469	845.99	401469	845.99
AACPS5	89.3395	9300.08	104.098	9300.08	104.098
NTD8_num1	25.3988	9939.38	391.333	9939.38	391.333
NTD8_num2	26.9004	9939.38	369.488	9939.38	369.488
NTD8_num3	45.4161	9939.38	218.852	9939.38	218.852
NTD8_num4	20.2554	9939.38	490.703	9939.38	490.703
GALCTD	56.4016	72941.9	1293.26	72941.9	1293.26
MLTG4	69.041	40858.4	591.799	40858.4	591.799
UDPGDC	445.733	10429	23.3974	10429	23.3974
PUNP4_num1	179.008	15875.7	88.6872	15875.7	88.6872
PUNP4_num2	155.7	15875.7	101.964	15875.7	101.964
AMAOTr	94.6712	3.6	0.0380263	3.6	0.0380263
NTD11pp_num1	60.824	16148	265.488	16148	265.488
NTD11pp_num2	104.414	16148	154.654	16148	154.654
DKGLCNR2x	70.791	19157.1	270.614	19157.1	270.614
ACGS	295.171	820800	2780.76	820800	2780.76
PDE1_num1	180.521	123620	684.794	123620	684.794
PDE1_num2	30.938	123620	3995.72	123620	3995.72
MCITD	53.9518	37457.9	694.285	37457.9	694.285
GLCATr	60.288	10408.4	172.645	10408.4	172.645
ALAALAr_num1	39.3158	17736.2	451.121	17736.2	451.121
ALAALAr_num2	65.6794	17736.2	270.042	17736.2	270.042
ACACT1r_num1	46.5305	64745.5	1391.46	64745.5	1391.46
ACACT1r_num2	161.41	64745.5	401.125	64745.5	401.125
ACACT1r_num3	81.7524	64745.5	791.971	64745.5	791.971
G2PPpp_num1	104.414	26350.7	252.367	26350.7	252.367
G2PPpp_num2	98.8772	26350.7	266.5	26350.7	266.5
AGM3PApp_num1	45.6344	23614.9	517.48	23614.9	517.48
AGM3PApp_num2	47.9852	23614.9	492.129	23614.9	492.129
AGM3PApp_num3	31.4121	23614.9	751.777	23614.9	751.777
AGM3PApp_num4	31.0724	23614.9	759.996	23614.9	759.996
SUCOAS	142.34	28613.1	201.019	28613.1	201.019
NTP1_num1	61.9863	27027.3	436.021	27027.3	436.021
NTP1_num2	39.1933	27027.3	689.59	27027.3	689.59
GALKr	41.4421	44343.2	1070	44343.2	1070
PANTS	63.1953	72	1.13933	72	1.13933
YUMPS	98.7297	17972.2	182.034	17972.2	182.034
DHQS	38.881	280800	7222.04	280800	7222.04
PGCD	176.703	72000	407.463	72000	407.463
ADSL1r	206.171	36000	174.612	36000	174.612
SERD_D	47.9006	27507.1	574.254	27507.1	574.254
AICART	57.3292	36000	627.952	36000	627.952
PFK_num1	139.368	1000800	7180.98	1000800	7180.98
PFK_num2	64.912	1000800	15417.8	1000800	15417.8
PGM_num1	57.1128	164088	2873.05	164088	2873.05
PGM_num2	56.1939	164088	2920.03	164088	2920.03
TPI	53.9436	259200	4805.02	259200	4805.02
RPI_num1	45.7208	71002.4	1552.96	71002.4	1552.96
RPI_num2	32.1466	71002.4	2208.71	71002.4	2208.71
PERD	82.7353	72	0.870245	72	0.870245
PYDAMK	61.6948	9300.7	150.753	9300.7	150.753
FADRx2	530.159	51368.8	96.8932	51368.8	96.8932
PDE4	180.521	64875.8	359.381	64875.8	359.381
AGM4PH	37.5947	9954.44	264.783	9954.44	264.783
AM4PA	20.5362	20712.2	1008.57	20712.2	1008.57
ATHRDHr	108.996	13509.7	123.947	13509.7	123.947
LSERDHr	108.996	14125.4	129.596	14125.4	129.596
DSERDHr	108.996	15835.5	145.286	15835.5	145.286
OBTFL_num1	198.919	21920.4	110.198	21920.4	110.198
OBTFL_num2	213.203	21920.4	102.815	21920.4	102.815
OBTFL_num3	114.14	21920.4	192.049	21920.4	192.049
G6PP_num1	29.7077	9870.74	332.262	9870.74	332.262
G6PP_num2	30.4128	9870.74	324.559	9870.74	324.559
G6PP_num3	23.0075	9870.74	429.023	9870.74	429.023
MMCD	175.036	22988	131.334	22988	131.334
GLNS	622.845	119723	192.22	3596400	5774.15
GTHS	142.244	42649.5	299.834	42649.5	299.834
UDPKAAT	41.6498	10842.2	260.317	10842.2	260.317
ULA4NFT	445.733	14287.5	32.054	14287.5	32.054
UPLA4FNT	36.3391	32384.4	891.172	32384.4	891.172
UPLA4FNF	33.1118	772258	23322.7	772258	23322.7
ULA4Ntppi	26.2771	36865.9	1402.97	36865.9	1402.97
HEPT1	35.5438	10345	291.05	10345	291.05
ALR2_num1	30.9866	10013.6	323.159	10013.6	323.159
ALR2_num2	31.1096	10013.6	321.881	10013.6	321.881
ALR2_num3	29.4368	10013.6	340.173	10013.6	340.173
ALR2_num4	38.8322	10013.6	257.868	10013.6	257.868
AMALT2	78.5035	43134.2	549.456	43134.2	549.456
MLTP1	181.045	24684.4	136.344	24684.4	136.344
HEPT2	39.0421	10836.9	277.57	10836.9	277.57
HXAND	129.799	64608.6	497.757	64608.6	497.757
MOAT3C	32.9201	11125.6	337.958	11125.6	337.958
RHAT1	36.7305	34002.4	925.727	34002.4	925.727
GALT1	40.8259	95078.5	2328.88	95078.5	2328.88
GLCTR2	39.4232	15230.7	386.339	15230.7	386.339
UDPGPpp	60.824	13977.4	229.8	13977.4	229.8
PPPGO	84.9052	9913.18	116.756	9913.18	116.756
ADNK1	23.586	28.8	1.22106	28.8	1.22106
HEPK1	30.8723	20974.9	679.408	20974.9	679.408
HEPT3	38.7307	22408.3	578.567	22408.3	578.567
HEPK2	27.461	26010.9	947.193	26010.9	947.193
ALDD3y_num1	36.5018	23753	650.734	23753	650.734
ALDD3y_num2	225.225	23753	105.463	23753	105.463
ALDD3y_num3	84.194	23753	282.122	23753	282.122
R5PP_num1	23.0075	9881.34	429.484	9881.34	429.484
R5PP_num2	20.7798	9881.34	475.526	9881.34	475.526
R5PP_num3	30.4128	9881.34	324.907	9881.34	324.907
R5PP_num4	27.1631	9881.34	363.778	9881.34	363.778
R5PP_num5	29.7211	9881.34	332.469	9881.34	332.469
CYSSADS_num1	86.4684	13159.5	152.188	13159.5	152.188
CYSSADS_num2	88.8675	13159.5	148.08	13159.5	148.08
CPPPGO2	52.729	9383.58	177.959	9383.58	177.959
AGM3PH	37.5947	9954.46	264.784	9954.46	264.784
LDH_D2	64.6123	11899.9	184.174	11899.9	184.174
SHCHF	99.9028	1224	12.2519	1224	12.2519
SUCBZL	200.739	16127.3	80.3399	16127.3	80.3399
CYSDDS	70.3066	27651.3	393.297	27651.3	393.297
NTP10_num1	39.1933	10200.1	260.251	10200.1	260.251
NTP10_num2	36.4253	10200.1	280.028	10200.1	280.028
PRAIS	73.7081	36000	488.413	36000	488.413
GDMANE	72.2823	130012	1798.67	130012	1798.67
GPDDA4	27.4096	9300.27	339.307	9300.27	339.307
LPLIPAL2E140	38.9783	9300.12	238.597	9300.12	238.597
LPLIPAL2E180	38.9783	21392.6	548.835	21392.6	548.835
LPLIPAL2G161	38.9783	11808.1	302.94	11808.1	302.94
LPLIPAL2G181	38.9783	10096.1	259.018	10096.1	259.018
AACPS6	89.3395	16920.2	189.393	16920.2	189.393
AACPS7	89.3395	19220.4	215.139	19220.4	215.139
QMO2	23.0648	24600.8	1066.6	24600.8	1066.6
QMO3	23.0648	33447.8	1450.17	33447.8	1450.17
LPLIPAL2E141	38.9783	9300.05	238.596	9300.05	238.596
LPLIPAL2E161	38.9783	10543.9	270.507	10543.9	270.507
LPLIPAL2E181	38.9783	9300.05	238.596	9300.05	238.596
LPLIPAL2G180	38.9783	10096.1	259.017	10096.1	259.017
LPLIPAL2G141	38.9783	9300.05	238.596	9300.05	238.596
IPDDI	20.5083	16631.7	810.973	16631.7	810.973
2AGPGAT180	80.7	9737.36	120.661	9737.36	120.661
2AGPGAT181	80.7	25994.2	322.109	25994.2	322.109
LPLIPAL2ATG120	38.9783	15263.4	391.587	15263.4	391.587
PLIPA1E140pp	66.3263	9300.05	140.217	9300.05	140.217
PLIPA1E160pp	66.3263	9319.16	140.505	9319.16	140.505
PLIPA1E161pp	66.3263	12158.3	183.31	12158.3	183.31
AACPS8	89.3395	19300.1	216.031	19300.1	216.031
AACPS9	89.3395	9300.08	104.098	9300.08	104.098
HXCT	92.9717	30493.6	327.988	30493.6	327.988
2AGPEAT160	80.7	83842.7	1038.94	83842.7	1038.94
DURADx	178.797	38271.1	214.048	38271.1	214.048
ECOAH7_num1	77.0722	37020.6	480.337	37020.6	480.337
ECOAH7_num2	159.188	37020.6	232.559	37020.6	232.559
G1PPpp_num1	91.3658	34600.6	378.704	34600.6	378.704
G1PPpp_num2	98.8772	34600.6	349.935	34600.6	349.935
GALCTND	42.5229	20418.5	480.176	20418.5	480.176
GCALDD	209.091	72	0.344347	72	0.344347
HISTP	80.5559	13680	169.82	13680	169.82
LDH_D	146.139	41919.8	286.849	41919.8	286.849
AMALT4	78.5035	32028.9	407.994	32028.9	407.994
NTD11_num1	26.9004	9325.75	346.677	9325.75	346.677
NTD11_num2	25.3988	9325.75	367.173	9325.75	367.173
ORNDC_num1	158.832	35745.3	225.051	35745.3	225.051
ORNDC_num2	164.832	35745.3	216.86	35745.3	216.86
UPP3MT	99.9028	9455.39	94.6459	9455.39	94.6459
KAS15	67.0302	22049.2	328.945	22049.2	328.945
FACOAL181t2pp_num1	124.664	20613.5	165.352	20613.5	165.352
FACOAL181t2pp_num2	60.7731	20613.5	339.188	20613.5	339.188
T2DECAI	37.9381	9300.05	245.137	9300.05	245.137
3OAS161	85.2266	9300.05	109.121	9300.05	109.121
EAR141y	111.456	9385.01	84.2039	9385.01	84.2039
EAR161x	111.456	9300.03	83.4414	9300.03	83.4414
DASYN160	31.4538	237600	7553.94	237600	7553.94
DASYN161	31.4538	280800	8927.38	280800	8927.38
DASYN181	31.4538	9600.28	305.218	9600.28	305.218
CDAPPA161	28.4508	10309.9	362.378	10309.9	362.378
PGSA180	20.7006	21211.7	1024.69	21211.7	1024.69
PSSA140	52.8018	18624.9	352.732	18624.9	352.732
2AGPGAT141	80.7	9645.64	119.525	9645.64	119.525
FACOAE180	127.865	44832.3	350.622	44832.3	350.622
FACOAE100	127.865	148842	1164.05	148842	1164.05
FACOAE80	127.865	9300.09	72.7335	9300.09	72.7335
FACOAE60	127.865	10237.3	80.0634	10237.3	80.0634
PLIPA1E120pp	66.3263	9300.06	140.217	9300.06	140.217
3OAS141	85.2266	9300.06	109.122	9300.06	109.122
3OAR121	102.241	9300.03	90.9616	9300.03	90.9616
CFAS160G	87.818	114927	1308.7	114927	1308.7
FACOAE141	127.865	22065.2	172.566	22065.2	172.566
FACOAE161	127.865	154800	1210.65	154800	1210.65
ALAALAD	21.213	21385.4	1008.13	21385.4	1008.13
2AGPEAT180	80.7	22628.4	280.401	22628.4	280.401
2AGPEAT181	80.7	21320.3	264.192	21320.3	264.192
2AGPGAT140	80.7	26004.8	322.241	26004.8	322.241
PLIPA1E181pp	66.3263	9300.04	140.217	9300.04	140.217
PLIPA1G180pp	66.3263	10731.7	161.802	10731.7	161.802
PLIPA1G181pp	66.3263	9331.15	140.686	9331.15	140.686
2AGPGAT161	80.7	9645.64	119.525	9645.64	119.525
AMPTASEPG_num1	329.279	29612.2	89.9304	29612.2	89.9304
AMPTASEPG_num2	277.081	29612.2	106.872	29612.2	106.872
AMPTASEPG_num3	98.9189	29612.2	299.358	29612.2	299.358
AMPTASEPG_num4	105.831	29612.2	279.807	29612.2	279.807
2AGPEAT140	80.7	33704.9	417.656	33704.9	417.656
2AGPEAT120	80.7	17213.1	213.297	17213.1	213.297
2AGPEAT161	80.7	16922.4	209.695	16922.4	209.695
2AGPEAT141	80.7	18684.3	231.528	18684.3	231.528
2AGPGAT160	80.7	9649.16	119.568	9649.16	119.568
LPLIPAL2ATG140	38.9783	14782.2	379.242	14782.2	379.242
LPLIPAL2ATG141	38.9783	9726.55	249.537	9726.55	249.537
LPLIPAL2ATG160	38.9783	41172.9	1056.3	41172.9	1056.3
LPLIPAL2ATG180	38.9783	14302.4	366.932	14302.4	366.932
LPLIPAL2ATG161	38.9783	28569.4	732.956	28569.4	732.956
LPLIPAL2ATG181	38.9783	19600.7	502.863	19600.7	502.863
CLPNS180pp_num1	54.8223	18171.3	331.458	18171.3	331.458
CLPNS180pp_num2	47.6335	18171.3	381.481	18171.3	381.481
CLPNS181pp_num1	54.8223	21182.3	386.381	21182.3	386.381
CLPNS181pp_num2	47.6335	21182.3	444.694	21182.3	444.694
PLIPA1G120pp	66.3263	9300.05	140.217	9300.05	140.217
CLPNS120pp_num1	47.6335	27301.7	573.161	27301.7	573.161
CLPNS120pp_num2	54.8223	27301.7	498.003	27301.7	498.003
ALPATE160pp	82.0363	16171.4	197.125	16171.4	197.125
ALPATG160pp	82.0363	27918.6	340.32	27918.6	340.32
2AGPGAT120	80.7	17444.7	216.167	17444.7	216.167
LPLIPAL2ATE120	38.9783	15214.4	390.331	15214.4	390.331
LPLIPAL2ATE140	38.9783	9795.36	251.303	9795.36	251.303
LPLIPAL2ATE160	38.9783	27150.8	696.563	27150.8	696.563
LPLIPAL2ATE180	38.9783	9726.6	249.539	9726.6	249.539
LPLIPAL2ATE141	38.9783	24162.8	619.903	24162.8	619.903
LPLIPAL2ATE161	38.9783	16457.6	422.226	16457.6	422.226
LPLIPAL2ATE181	38.9783	9769.1	250.629	9769.1	250.629
FACOAL141t2pp_num1	60.7731	18524.5	304.814	18524.5	304.814
FACOAL141t2pp_num2	124.664	18524.5	148.596	18524.5	148.596
FACOAL161t2pp_num1	124.664	21999.5	176.47	21999.5	176.47
FACOAL161t2pp_num2	60.7731	21999.5	361.994	21999.5	361.994
PGPP140pp_num1	19.4181	9509.04	489.7	9509.04	489.7
PGPP140pp_num2	29.0213	9509.04	327.657	9509.04	327.657
PGPP141pp_num1	19.4181	17501.1	901.277	17501.1	901.277
PGPP141pp_num2	29.0213	17501.1	603.043	17501.1	603.043
PGPP160pp_num1	19.4181	9538.65	491.225	9538.65	491.225
PGPP160pp_num2	29.0213	9538.65	328.678	9538.65	328.678
PGPP180pp_num1	19.4181	9522.98	490.418	9522.98	490.418
PGPP180pp_num2	29.0213	9522.98	328.138	9522.98	328.138
PLIPA1E180pp	66.3263	11091.6	167.227	11091.6	167.227
PLIPA1G140pp	66.3263	9331.09	140.685	9331.09	140.685
PLIPA1G161pp	66.3263	9331.31	140.688	9331.31	140.688
CLPNS160pp_num1	47.6335	33484.6	702.963	33484.6	702.963
CLPNS160pp_num2	54.8223	33484.6	610.784	33484.6	610.784
CLPNS161pp_num1	54.8223	23978.2	437.381	23978.2	437.381
CLPNS161pp_num2	47.6335	23978.2	503.39	23978.2	503.39
PAPA120pp	29.0213	15536.1	535.333	15536.1	535.333
PAPA140pp	29.0213	9492.46	327.086	9492.46	327.086
PAPA141pp	29.0213	17942.6	618.257	17942.6	618.257
PAPA160pp	29.0213	9448.3	325.564	9448.3	325.564
PAPA161pp	29.0213	14822.9	510.76	14822.9	510.76
PAPA180pp	29.0213	16282.2	561.042	16282.2	561.042
HPYRI	58.7549	50196.1	854.331	50196.1	854.331
TPRDCOAS	31.6444	23356.1	738.08	23356.1	738.08
FLVRx	26.242	10178.4	387.868	10178.4	387.868
GGPTRCO	47.1695	59111.2	1253.17	59111.2	1253.17
HYD1pp_num1	181.748	5.27194e+06	29006.8	5.27194e+06	29006.8
HYD1pp_num2	482.933	5.27194e+06	10916.5	5.27194e+06	10916.5
HYD1pp_num3	232.269	5.27194e+06	22697.6	5.27194e+06	22697.6
ECAP3pp	135.966	54306.8	399.415	54306.8	399.415
FMNRx_num1	42.5067	23127.6	544.093	23127.6	544.093
FMNRx_num2	26.242	23127.6	881.32	23127.6	881.32
DHBS	118.224	20871.1	176.538	20871.1	176.538
MDDCP1pp_num1	41.849	54493.2	1302.14	54493.2	1302.14
MDDCP1pp_num2	87.2178	54493.2	624.794	54493.2	624.794
MDDCP1pp_num3	88.8879	54493.2	613.055	54493.2	613.055
MDDCP1pp_num4	51.7983	54493.2	1052.03	54493.2	1052.03
MDDCP1pp_num5	43.3461	54493.2	1257.16	54493.2	1257.16
MDDCP1pp_num6	47.7524	54493.2	1141.16	54493.2	1141.16
GUI2	53.9872	34845	645.432	34845	645.432
OMBZLM	28.0732	37665.4	1341.68	37665.4	1341.68
GLYCK	38.7345	29775.9	768.717	29775.9	768.717
MLTG5	69.041	51313.5	743.232	51313.5	743.232
GPDDA3	27.4096	16136.7	588.723	16136.7	588.723
2DOXG6PP_num1	23.0075	9865.3	428.786	9865.3	428.786
2DOXG6PP_num2	29.7077	9865.3	332.079	9865.3	332.079
2DOXG6PP_num3	24.3302	9865.3	405.475	9865.3	405.475
2DOXG6PP_num4	30.3709	9865.3	324.827	9865.3	324.827
AGMH	37.5947	17554.4	466.939	17554.4	466.939
MPTG_num1	186.321	18797	100.885	18797	100.885
MPTG_num2	128.596	18797	146.171	18797	146.171
MPTG_num3	194.891	18797	96.4491	18797	96.4491
MPTG_num4	195.547	18797	96.1253	18797	96.1253
MPTG2_num1	194.891	11151.8	57.2208	11151.8	57.2208
MPTG2_num2	195.547	11151.8	57.0287	11151.8	57.0287
MPTG2_num3	128.596	11151.8	86.7195	11151.8	86.7195
MPTG2_num4	186.321	11151.8	59.8524	11151.8	59.8524
MCTP1App_num1	228.37	42697.9	186.968	42697.9	186.968
MCTP1App_num2	229.027	42697.9	186.432	42697.9	186.432
MCTP2App_num1	228.37	125796	550.844	125796	550.844
MCTP2App_num2	229.027	125796	549.265	125796	549.265
MCTP1Bpp_num1	36.0824	374951	10391.5	374951	10391.5
MCTP1Bpp_num2	67.8125	374951	5529.24	374951	5529.24
SFGTHi_num1	125.037	65737.5	525.744	65737.5	525.744
SFGTHi_num2	31.4245	65737.5	2091.92	65737.5	2091.92
DSBCGT	51.2433	35098.2	684.933	35098.2	684.933
DSBGGT	54.99	176927	3217.43	176927	3217.43
DHNAOT4	33.594	28638.8	852.496	28638.8	852.496
AMPMS2	70.8504	25.2	0.355679	25.2	0.355679
THIORDXi_num1	20.4696	21554.2	1052.99	21554.2	1052.99
THIORDXi_num2	29.4406	21554.2	732.125	21554.2	732.125
THIORDXi_num3	33.1887	21554.2	649.444	21554.2	649.444
PPPGO3	84.9052	432	5.08803	432	5.08803
PDX5POi	51.0903	108	2.1139	108	2.1139
PLIPA1A181pp	66.3263	9331.09	140.685	9331.09	140.685
LPLIPAL2A141	38.9783	9300.08	238.596	9300.08	238.596
CYTBO3_4pp	143.931	2.05255e+06	14260.6	2.05255e+06	14260.6
EAR141x	111.456	14822.3	132.988	14822.3	132.988
EAR181x	111.456	24255.2	217.621	24255.2	217.621
EAR181y	111.456	16968.8	152.247	16968.8	152.247
G3PAT141	100.021	9708.96	97.0692	9708.96	97.0692
G3PAT181	100.021	18222.1	182.182	18222.1	182.182
DASYN140	31.4538	24328	773.451	24328	773.451
DASYN180	31.4538	17275.6	549.237	17275.6	549.237
DASYN141	31.4538	23858.2	758.516	23858.2	758.516
CDAPPA160	28.4508	33511.4	1177.87	33511.4	1177.87
CDAPPA141	28.4508	30059.9	1056.56	30059.9	1056.56
PGSA141	20.7006	18750.2	905.782	18750.2	905.782
5DOAN	48.7079	36	0.7391	36	0.7391
FACOAE120	127.865	79200	619.402	79200	619.402
3OAR120	102.241	9300.03	90.9617	9300.03	90.9617
3HAD80_num1	37.9381	9300.03	245.137	9300.03	245.137
3HAD80_num2	102.198	9300.03	91.0004	9300.03	91.0004
3HAD120_num1	102.198	9300.05	91.0005	9300.05	91.0005
3HAD120_num2	37.9381	9300.05	245.137	9300.05	245.137
EAR180x	111.456	12882.1	115.58	12882.1	115.58
EAR180y	111.456	9300.03	83.4414	9300.03	83.4414
AGPAT120	27.4532	9300.24	338.767	9300.24	338.767
PGPP120_num1	19.4181	9300.06	478.937	9300.06	478.937
PGPP120_num2	29.0213	9300.06	320.456	9300.06	320.456
DAGK120	39.734	18232	458.851	18232	458.851
PSSA180	52.8018	22589.4	427.816	22589.4	427.816
PSSA161	52.8018	64800	1227.23	64800	1227.23
PSSA141	52.8018	10725.6	203.129	10725.6	203.129
PSD160	35.9344	24120	671.223	24120	671.223
PSD161	35.9344	28440	791.442	28440	791.442
PSD180	35.9344	11039.2	307.204	11039.2	307.204
COLIPAabcpp	128.921	9847.99	76.3876	9847.99	76.3876
PLIPA2A140pp	66.3263	9319.15	140.505	9319.15	140.505
PLIPA2A141pp	66.3263	9319.15	140.505	9319.15	140.505
PLIPA2A180pp	66.3263	9300.04	140.217	9300.04	140.217
CU1Opp	56.5562	40900.2	723.178	40900.2	723.178
SUCDi	355.075	383164	1079.11	383164	1079.11
LPLIPAL1E141pp	94.4886	9609.13	101.696	9609.13	101.696
LALDO2x	309.698	30808	99.4778	30808	99.4778
LPLIPAL1E160pp	94.4886	15013.9	158.896	15013.9	158.896
LPLIPAL1E180pp	94.4886	9300.06	98.4252	9300.06	98.4252
LPLIPAL1E181pp	94.4886	9300.05	98.4251	9300.05	98.4251
LPLIPAL1G160pp	94.4886	9751.66	103.205	9751.66	103.205
LPLIPAL1G161pp	94.4886	15394	162.92	15394	162.92
LPLIPAL1G120pp	94.4886	9607.45	101.678	9607.45	101.678
PLIPA2E140pp	66.3263	9652.15	145.525	9652.15	145.525
PLIPA2E160pp	66.3263	9379.56	141.415	9379.56	141.415
PLIPA2A161pp	66.3263	9331.85	140.696	9331.85	140.696
PLIPA2A181pp	66.3263	12083.6	182.185	12083.6	182.185
ALR4x	309.698	45141.9	145.761	45141.9	145.761
LPLIPAL1G141pp	94.4886	9300.06	98.4252	9300.06	98.4252
LPLIPAL1G180pp	94.4886	14240	150.707	14240	150.707
LPLIPAL1G181pp	94.4886	9300.05	98.4251	9300.05	98.4251
ACONTb_num1	186.996	102220	546.642	102220	546.642
ACONTb_num2	195.354	102220	523.254	102220	523.254
GLCP2_num1	181.045	256439	1416.44	256439	1416.44
GLCP2_num2	186.345	256439	1376.15	256439	1376.15
PLIPA2E141pp	66.3263	11806.1	178.001	11806.1	178.001
PLIPA2E181pp	66.3263	9300.06	140.217	9300.06	140.217
PLIPA2G140pp	66.3263	9300.05	140.217	9300.05	140.217
3HAD161_num1	37.9381	9300.03	245.137	9300.03	245.137
3HAD161_num2	102.198	9300.03	91.0004	9300.03	91.0004
PLIPA2G160pp	66.3263	9331.09	140.685	9331.09	140.685
PLIPA2G181pp	66.3263	9300.26	140.22	9300.26	140.22
ASNS1	125.318	11068.9	88.3265	11068.9	88.3265
EAR80y	111.456	9300.03	83.4414	9300.03	83.4414
EAR120y	111.456	9300.03	83.4414	9300.03	83.4414
3OAR181	102.241	16993.4	166.209	16993.4	166.209
3HAD121_num1	37.9381	9300.04	245.137	9300.04	245.137
3HAD121_num2	102.198	9300.04	91.0005	9300.04	91.0005
EAR121y	111.456	9300.03	83.4414	9300.03	83.4414
GTHRDHpp	61.768	75120	1216.16	75120	1216.16
MDDCP2pp_num1	47.7524	26499.8	554.941	26499.8	554.941
MDDCP2pp_num2	87.2178	26499.8	303.835	26499.8	303.835
MDDCP2pp_num3	88.8879	26499.8	298.126	26499.8	298.126
MDDCP2pp_num4	51.7983	26499.8	511.596	26499.8	511.596
MDDCP2pp_num5	43.3461	26499.8	611.353	26499.8	611.353
MDDCP2pp_num6	41.849	26499.8	633.224	26499.8	633.224
MDDCP3pp_num1	47.7524	26609.1	557.23	26609.1	557.23
MDDCP3pp_num2	87.2178	26609.1	305.088	26609.1	305.088
MDDCP3pp_num3	88.8879	26609.1	299.355	26609.1	299.355
MDDCP3pp_num4	51.7983	26609.1	513.706	26609.1	513.706
MDDCP3pp_num5	43.3461	26609.1	613.875	26609.1	613.875
MDDCP3pp_num6	41.849	26609.1	635.835	26609.1	635.835
EAR140x	111.456	18506.5	166.043	18506.5	166.043
EAR40y	111.456	15779.8	141.579	15779.8	141.579
3OAS181	86.0915	13204.2	153.374	13204.2	153.374
EAR161y	111.456	9387.63	84.2273	9387.63	84.2273
G3PAT140	100.021	21089.5	210.851	21089.5	210.851
G3PAT160	100.021	19657.2	196.531	19657.2	196.531
G3PAT161	100.021	21670.1	216.656	21670.1	216.656
AGPAT160	27.4532	489600	17834	489600	17834
CDAPPA140	28.4508	9300.23	326.888	9300.23	326.888
MLDCP1App_num1	36.0824	12050.8	333.979	12050.8	333.979
MLDCP1App_num2	34.4111	12050.8	350.2	12050.8	350.2
MLDCP1App_num3	67.8125	12050.8	177.707	12050.8	177.707
MLDCP1App_num4	34.6359	12050.8	347.927	12050.8	347.927
MLDCP1App_num5	33.3253	12050.8	361.61	12050.8	361.61
EAR160y	111.456	9300.03	83.4415	9300.03	83.4415
EAR100y	111.456	9300.03	83.4414	9300.03	83.4414
3OAR141	102.241	9300.03	90.9617	9300.03	90.9617
3OAR161	102.241	9300.06	90.9619	9300.06	90.9619
3HAD141_num1	37.9381	9300.02	245.137	9300.02	245.137
3HAD141_num2	102.198	9300.02	91.0003	9300.02	91.0003
EAR121x	111.456	14092.4	126.439	14092.4	126.439
PSD140	35.9344	23485.3	653.562	23485.3	653.562
MICITDr	186.996	24735.9	132.28	24735.9	132.28
CDAPPA181	28.4508	32332.6	1136.44	32332.6	1136.44
PGSA140	20.7006	9537.62	460.741	9537.62	460.741
LPLIPAL1A141pp	94.4886	10375.4	109.805	10375.4	109.805
LPLIPAL1A180pp	94.4886	9300.05	98.4251	9300.05	98.4251
LPLIPAL1E140pp	94.4886	9607.46	101.679	9607.46	101.679
LPLIPAL1E161pp	94.4886	13797	146.017	13797	146.017
LPLIPAL1G140pp	94.4886	9300.04	98.425	9300.04	98.425
ACONTa_num1	186.996	77882.1	416.49	77882.1	416.49
ACONTa_num2	195.354	77882.1	398.671	77882.1	398.671
MLDCP2App_num1	67.8125	61771.4	910.914	61771.4	910.914
MLDCP2App_num2	36.0824	61771.4	1711.95	61771.4	1711.95
MLDCP2App_num3	34.6359	61771.4	1783.45	61771.4	1783.45
MLDCP2App_num4	33.3253	61771.4	1853.59	61771.4	1853.59
MLDCP2App_num5	34.4111	61771.4	1795.1	61771.4	1795.1
PGPP120pp_num1	19.4181	39502.1	2034.29	39502.1	2034.29
PGPP120pp_num2	29.0213	39502.1	1361.14	39502.1	1361.14
PGPP181pp_num1	19.4181	9508.83	489.689	9508.83	489.689
PGPP181pp_num2	29.0213	9508.83	327.65	9508.83	327.65
PGSA181	20.7006	9767	471.822	9767	471.822
PGPP140_num1	19.4181	9921.21	510.926	9921.21	510.926
PGPP140_num2	29.0213	9921.21	341.86	9921.21	341.86
PGPP141_num1	19.4181	9300.06	478.938	9300.06	478.938
PGPP141_num2	29.0213	9300.06	320.456	9300.06	320.456
MDDCP5pp_num1	47.7524	152011	3183.31	152011	3183.31
MDDCP5pp_num2	87.2178	152011	1742.89	152011	1742.89
MDDCP5pp_num3	88.8879	152011	1710.14	152011	1710.14
MDDCP5pp_num4	51.7983	152011	2934.67	152011	2934.67
MDDCP5pp_num5	43.3461	152011	3506.91	152011	3506.91
MDDCP5pp_num6	41.849	152011	3632.37	152011	3632.37
MLTGY3pp_num1	49.4175	26411.4	534.455	26411.4	534.455
MLTGY3pp_num2	40.1125	26411.4	658.434	26411.4	658.434
MLTGY3pp_num3	40.2558	26411.4	656.091	26411.4	656.091
MLTGY3pp_num4	73.3532	26411.4	360.059	26411.4	360.059
MLTGY3pp_num5	40.4106	26411.4	653.577	26411.4	653.577
MLTGY3pp_num6	22.2266	26411.4	1188.28	26411.4	1188.28
MLTGY3pp_num7	58.3022	26411.4	453.009	26411.4	453.009
MLTGY3pp_num8	38.2474	26411.4	690.542	26411.4	690.542
G3PAT180	100.021	9300.06	92.9811	9300.06	92.9811
AGPAT140	27.4532	11008.3	400.984	11008.3	400.984
PGSA160	20.7006	10557.8	510.024	10557.8	510.024
MLDCP2Bpp_num1	36.0824	71515.3	1982	71515.3	1982
MLDCP2Bpp_num2	33.3253	71515.3	2145.98	71515.3	2145.98
MLDCP2Bpp_num3	34.6359	71515.3	2064.77	71515.3	2064.77
MLDCP2Bpp_num4	34.4111	71515.3	2078.26	71515.3	2078.26
MLDCP2Bpp_num5	67.8125	71515.3	1054.6	71515.3	1054.6
3OAS140_num1	85.2266	15220.9	178.593	15220.9	178.593
3OAS140_num2	86.0915	15220.9	176.799	15220.9	176.799
3OAR140	102.241	4680	45.7741	4680	45.7741
3OAR160	102.241	9300.03	90.9617	9300.03	90.9617
PGSA161	20.7006	23465.3	1133.56	23465.3	1133.56
3HAD181_num1	37.9381	16748.6	441.472	16748.6	441.472
3HAD181_num2	102.198	16748.6	163.885	16748.6	163.885
PGPP160_num1	19.4181	9509.75	489.736	9509.75	489.736
PGPP160_num2	29.0213	9509.75	327.682	9509.75	327.682
PGPP180_num1	19.4181	17376	894.834	17376	894.834
PGPP180_num2	29.0213	17376	598.732	17376	598.732
PGPP161_num1	19.4181	9547.69	491.69	9547.69	491.69
PGPP161_num2	29.0213	9547.69	328.989	9547.69	328.989
PGPP181_num1	29.0213	17234	593.839	17234	593.839
PGPP181_num2	19.4181	17234	887.521	17234	887.521
CDAPPA180	28.4508	63141.7	2219.33	63141.7	2219.33
NTP12	36.4253	9852.66	270.49	9852.66	270.49
PSD141	35.9344	26441	735.814	26441	735.814
PAPA181pp	29.0213	9300.08	320.457	9300.08	320.457
MDDCP4pp_num1	47.7524	11770.5	246.491	11770.5	246.491
MDDCP4pp_num2	87.2178	11770.5	134.956	11770.5	134.956
MDDCP4pp_num3	88.8879	11770.5	132.42	11770.5	132.42
MDDCP4pp_num4	51.7983	11770.5	227.238	11770.5	227.238
MDDCP4pp_num5	43.3461	11770.5	271.548	11770.5	271.548
MDDCP4pp_num6	41.849	11770.5	281.262	11770.5	281.262
CLPNS140pp_num1	54.8223	10794.8	196.905	10794.8	196.905
CLPNS140pp_num2	47.6335	10794.8	226.621	10794.8	226.621
CLPNS141pp_num1	54.8223	32295.1	589.087	32295.1	589.087
CLPNS141pp_num2	47.6335	32295.1	677.991	32295.1	677.991
CFAS160E	87.818	52560.3	598.514	52560.3	598.514
CFAS180E	87.818	1.61223e+06	18358.8	1.61223e+06	18358.8
CFAS180G	87.818	107778	1227.28	107778	1227.28
PAPA160	29.0213	16190.8	557.894	16190.8	557.894
PAPA180	29.0213	15173.5	522.839	15173.5	522.839
PAPA181	29.0213	19467.1	670.787	19467.1	670.787
PETNT161pp	63.8044	23599.6	369.875	23599.6	369.875
PSSA160	52.8018	54000	1022.69	54000	1022.69
PSSA181	52.8018	18305.1	346.676	18305.1	346.676
DAGK140	39.734	9418.97	237.051	9418.97	237.051
DAGK160	39.734	9419	237.051	9419	237.051
DAGK141	39.734	9300.31	234.064	9300.31	234.064
DAGK161	39.734	18097.8	455.473	18097.8	455.473
AGPAT181	27.4532	71164.9	2592.23	71164.9	2592.23
MDDEP3pp_num1	29.9166	33111.6	1106.8	33111.6	1106.8
MDDEP3pp_num2	21.0399	33111.6	1573.75	33111.6	1573.75
MDDEP3pp_num3	60.2733	33111.6	549.357	33111.6	549.357
MDDEP3pp_num4	51.7983	33111.6	639.241	33111.6	639.241
MDDEP3pp_num5	33.8874	33111.6	977.106	33111.6	977.106
MDDEP3pp_num6	41.849	33111.6	791.216	33111.6	791.216
MDDEP3pp_num7	49.0578	33111.6	674.95	33111.6	674.95
MDDEP4pp_num1	29.9166	26328	880.047	26328	880.047
MDDEP4pp_num2	41.849	26328	629.119	26328	629.119
MDDEP4pp_num3	60.2733	26328	436.81	26328	436.81
MDDEP4pp_num4	51.7983	26328	508.279	26328	508.279
MDDEP4pp_num5	33.8874	26328	776.926	26328	776.926
MDDEP4pp_num6	21.0399	26328	1251.34	26328	1251.34
MDDEP4pp_num7	49.0578	26328	536.673	26328	536.673
MLTGY1pp_num1	49.4175	31677.6	641.019	31677.6	641.019
MLTGY1pp_num2	22.2266	31677.6	1425.21	31677.6	1425.21
MLTGY1pp_num3	40.4106	31677.6	783.892	31677.6	783.892
MLTGY1pp_num4	40.1125	31677.6	789.718	31677.6	789.718
MLTGY1pp_num5	73.3532	31677.6	431.85	31677.6	431.85
MLTGY1pp_num6	40.2558	31677.6	786.907	31677.6	786.907
MLTGY1pp_num7	58.3022	31677.6	543.334	31677.6	543.334
MLTGY1pp_num8	38.2474	31677.6	828.228	31677.6	828.228
3HAD40_num1	37.9381	13622.6	359.075	13622.6	359.075
3HAD40_num2	102.198	13622.6	133.297	13622.6	133.297
PLIPA1E141pp	66.3263	9300.04	140.216	9300.04	140.216
3OAS60_num1	86.0915	14210.8	165.067	14210.8	165.067
3OAS60_num2	85.2266	14210.8	166.742	14210.8	166.742
3OAS160_num1	85.2266	9300.05	109.121	9300.05	109.121
3OAS160_num2	86.0915	9300.05	108.025	9300.05	108.025
3OAR60	102.241	14676.6	143.549	14676.6	143.549
3OAR80	102.241	9300.03	90.9617	9300.03	90.9617
MLDCP3App_num1	36.0824	11472.3	317.947	11472.3	317.947
MLDCP3App_num2	34.4111	11472.3	333.389	11472.3	333.389
MLDCP3App_num3	67.8125	11472.3	169.177	11472.3	169.177
MLDCP3App_num4	34.6359	11472.3	331.225	11472.3	331.225
MLDCP3App_num5	33.3253	11472.3	344.252	11472.3	344.252
MLDCP1Bpp_num1	36.0824	38207.6	1058.9	38207.6	1058.9
MLDCP1Bpp_num2	34.4111	38207.6	1110.33	38207.6	1110.33
MLDCP1Bpp_num3	67.8125	38207.6	563.431	38207.6	563.431
MLDCP1Bpp_num4	34.6359	38207.6	1103.12	38207.6	1103.12
MLDCP1Bpp_num5	33.3253	38207.6	1146.51	38207.6	1146.51
PLIPA1G160pp	66.3263	9331.08	140.685	9331.08	140.685
PLIPA1G141pp	66.3263	9300.06	140.217	9300.06	140.217
LPLIPAL2E160	38.9783	22686.5	582.03	22686.5	582.03
LPLIPAL2G140	38.9783	16311.9	418.486	16311.9	418.486
LPLIPAL2G160	38.9783	10136.7	260.061	10136.7	260.061
LPLIPAL2G120	38.9783	9300.05	238.596	9300.05	238.596
PGPP161pp_num1	19.4181	9508.61	489.678	9508.61	489.678
PGPP161pp_num2	29.0213	9508.61	327.642	9508.61	327.642
PAPA140	29.0213	33006.2	1137.31	33006.2	1137.31
PAPA141	29.0213	9542.9	328.824	9542.9	328.824
PAPA161	29.0213	17767.6	612.228	17767.6	612.228
DSBAO1	43.2467	20873.2	482.655	20873.2	482.655
DSBAO2	43.2467	11874.5	274.576	11874.5	274.576
DSBDR_num1	77.3499	37200.9	480.944	37200.9	480.944
DSBDR_num2	73.6017	37200.9	505.436	37200.9	505.436
PLIPA2A120pp	66.3263	9319.13	140.504	9319.13	140.504
PLIPA2A160pp	66.3263	14809.6	223.284	14809.6	223.284
LPLIPAL2E120	38.9783	9300.09	238.597	9300.09	238.597
EAR100x	111.456	13324.9	119.553	13324.9	119.553
EAR120x	111.456	15973.8	143.319	15973.8	143.319
EAR160x	111.456	9300.03	83.4415	9300.03	83.4415
EAR140y	111.456	15246	136.79	15246	136.79
3OAS121	85.2266	9300.07	109.122	9300.07	109.122
3OAS80_num1	85.2266	9300.06	109.122	9300.06	109.122
3OAS80_num2	86.0915	9300.06	108.025	9300.06	108.025
3OAS100_num1	85.2266	9300.07	109.122	9300.07	109.122
3OAS100_num2	86.0915	9300.07	108.025	9300.07	108.025
3OAS120_num1	86.0915	9300.04	108.025	9300.04	108.025
3OAS120_num2	85.2266	9300.04	109.121	9300.04	109.121
3OAR40	102.241	11866.9	116.068	11866.9	116.068
3OAR100	102.241	9300.04	90.9617	9300.04	90.9617
3HAD60_num1	37.9381	35394.2	932.947	35394.2	932.947
3HAD60_num2	102.198	35394.2	346.331	35394.2	346.331
3HAD100_num1	37.9381	9300.03	245.137	9300.03	245.137
3HAD100_num2	102.198	9300.03	91.0004	9300.03	91.0004
3HAD140_num1	37.9381	9689	255.39	9689	255.39
3HAD140_num2	102.198	9689	94.8064	9689	94.8064
3HAD160_num1	37.9381	9300.05	245.137	9300.05	245.137
3HAD160_num2	102.198	9300.05	91.0006	9300.05	91.0006
AGPAT180	27.4532	9300.22	338.766	9300.22	338.766
AGPAT141	27.4532	18651.9	679.408	18651.9	679.408
AGPAT161	27.4532	576000	20981.2	576000	20981.2
DASYN120	31.4538	9544.49	303.445	9544.49	303.445
EAR40x	111.456	44179.3	396.384	44179.3	396.384
EAR60y	111.456	14300.6	128.308	14300.6	128.308
MLDEP1pp	60.2733	42681	708.124	42681	708.124
MLDEP2pp	60.2733	29895.3	495.996	29895.3	495.996
MLTGY2pp_num1	49.4175	72155.4	1460.12	72155.4	1460.12
MLTGY2pp_num2	22.2266	72155.4	3246.35	72155.4	3246.35
MLTGY2pp_num3	40.4106	72155.4	1785.56	72155.4	1785.56
MLTGY2pp_num4	40.1125	72155.4	1798.83	72155.4	1798.83
MLTGY2pp_num5	73.3532	72155.4	983.67	72155.4	983.67
MLTGY2pp_num6	40.2558	72155.4	1792.42	72155.4	1792.42
MLTGY2pp_num7	58.3022	72155.4	1237.61	72155.4	1237.61
MLTGY2pp_num8	38.2474	72155.4	1886.54	72155.4	1886.54
MLTGY4pp_num1	49.4175	14601	295.462	14601	295.462
MLTGY4pp_num2	40.1125	14601	364.001	14601	364.001
MLTGY4pp_num3	40.2558	14601	362.705	14601	362.705
MLTGY4pp_num4	73.3532	14601	199.051	14601	199.051
MLTGY4pp_num5	40.4106	14601	361.316	14601	361.316
MLTGY4pp_num6	22.2266	14601	656.915	14601	656.915
MLTGY4pp_num7	58.3022	14601	250.436	14601	250.436
MLTGY4pp_num8	38.2474	14601	381.751	14601	381.751
EAR60x	111.456	13560.5	121.667	13560.5	121.667
EAR80x	111.456	14706.9	131.953	14706.9	131.953
NTP11	36.4253	10027.8	275.299	10027.8	275.299
3OAS180_num1	86.0915	16823	195.408	16823	195.408
3OAS180_num2	85.2266	16823	197.391	16823	197.391
3HAD180_num1	37.9381	9449.86	249.086	9449.86	249.086
3HAD180_num2	102.198	9449.86	92.4665	9449.86	92.4665
CDAPPA120	28.4508	31900.5	1121.25	31900.5	1121.25
PSSA120	52.8018	21806.9	412.995	21806.9	412.995
PSD120	35.9344	38651.5	1075.61	38651.5	1075.61
PAPA120	29.0213	36805	1268.21	36805	1268.21
MDDEP1pp_num1	21.0399	30020.4	1426.83	30020.4	1426.83
MDDEP1pp_num2	29.9166	30020.4	1003.47	30020.4	1003.47
MDDEP1pp_num3	60.2733	30020.4	498.071	30020.4	498.071
MDDEP1pp_num4	51.7983	30020.4	579.563	30020.4	579.563
MDDEP1pp_num5	33.8874	30020.4	885.886	30020.4	885.886
MDDEP1pp_num6	49.0578	30020.4	611.939	30020.4	611.939
MDDEP1pp_num7	41.849	30020.4	717.35	30020.4	717.35
MDDEP2pp_num1	21.0399	194469	9242.86	194469	9242.86
MDDEP2pp_num2	29.9166	194469	6500.37	194469	6500.37
MDDEP2pp_num3	60.2733	194469	3226.45	194469	3226.45
MDDEP2pp_num4	51.7983	194469	3754.35	194469	3754.35
MDDEP2pp_num5	33.8874	194469	5738.68	194469	5738.68
MDDEP2pp_num6	49.0578	194469	3964.08	194469	3964.08
MDDEP2pp_num7	41.849	194469	4646.92	194469	4646.92
PSD181	35.9344	18069.5	502.848	18069.5	502.848
DAGK180	39.734	9300.36	234.066	9300.36	234.066
DAGK181	39.734	13406.3	337.4	13406.3	337.4
PLIPA2E120pp	66.3263	10490.6	158.166	10490.6	158.166
PLIPA2G141pp	66.3263	9300.05	140.217	9300.05	140.217
PLIPA2G161pp	66.3263	11859.9	178.812	11859.9	178.812
LPLIPAL1A120pp	94.4886	9607.45	101.678	9607.45	101.678
LPLIPAL1A140pp	94.4886	21414.7	226.638	21414.7	226.638
LPLIPAL1A181pp	94.4886	15755.1	166.741	15755.1	166.741
LPLIPAL1E120pp	94.4886	18049.2	191.02	18049.2	191.02
3OAR180	102.241	9346.61	91.4172	9346.61	91.4172
G3PAT120	100.021	9886.46	98.8438	9886.46	98.8438
PGSA120	20.7006	9537.67	460.744	9537.67	460.744
NADHPO	319.969	10193.8	31.8587	10193.8	31.8587
ACOAD7f	89.2244	168849	1892.41	168849	1892.41
ACOAD8f	89.2244	76148.3	853.447	76148.3	853.447
ACOAD5f	89.2244	223004	2499.36	223004	2499.36
ACOAD3f	89.2244	374886	4201.61	374886	4201.61
ACOAD2f	89.2244	426234	4777.1	426234	4777.1
ACOAD4f	89.2244	185797	2082.36	185797	2082.36
ACOAD6f	89.2244	208641	2338.38	208641	2338.38
NADH16pp	540.414	700176	1295.63	5400000	9992.34
NADH18pp	540.414	12049.2	22.2962	12049.2	22.2962
CTBTCAL2	58.5591	10877.6	185.755	10877.6	185.755
BGLA1_num1	53.9349	37406.1	693.542	37406.1	693.542
BGLA1_num2	202.05	37406.1	185.133	37406.1	185.133
BGLA1_num3	53.1613	37406.1	703.634	37406.1	703.634
GDPMNP	43.4973	58494.9	1344.79	58494.9	1344.79
AMMQLT8	28.0732	25407.6	905.048	25407.6	905.048
FA120ACPHi	22.9611	17684.1	770.178	17684.1	770.178
FA80ACPHi	22.9611	9507.79	414.082	9507.79	414.082
FA140ACPHi	22.9611	100253	4366.21	100253	4366.21
FA100ACPHi	22.9611	9507.91	414.088	9507.91	414.088
CRNDCAL2	58.5591	20216.4	345.231	20216.4	345.231
CRNCAL2	58.5591	10143.3	173.214	10143.3	173.214
FRULYSE	249.351	20347.5	81.6021	20347.5	81.6021
OXCDC	242.325	11287.6	46.5806	11287.6	46.5806
LPLIPAL2A140	38.9783	9300.04	238.595	9300.04	238.595
LPLIPAL2A160	38.9783	10123.7	259.727	10123.7	259.727
LPLIPAL2A161	38.9783	25406	651.799	25406	651.799
LPLIPAL2A180	38.9783	18839.7	483.338	18839.7	483.338
LPLIPAL2A181	38.9783	13091.8	335.874	13091.8	335.874
UM3PL	49.8741	9421.28	188.901	9421.28	188.901
UM4PL	49.8741	9308.52	186.64	9308.52	186.64
2MAHMP_num1	30.3709	10170.5	334.876	10170.5	334.876
2MAHMP_num2	17.4329	10170.5	583.408	10170.5	583.408
PLIPA1A120pp	66.3263	9300.04	140.216	9300.04	140.216
PLIPA1A140pp	66.3263	9300.04	140.216	9300.04	140.216
PLIPA1A141pp	66.3263	9300.07	140.217	9300.07	140.217
PLIPA1A160pp	66.3263	12745.1	192.158	12745.1	192.158
PLIPA1A161pp	66.3263	21566.4	325.156	21566.4	325.156
PLIPA1A180pp	66.3263	12246.5	184.64	12246.5	184.64
LPLIPAL2A120	38.9783	9300.08	238.596	9300.08	238.596
KDUI	186.458	45006.2	241.374	45006.2	241.374
NADH17pp	540.414	134714	249.28	134714	249.28
FA161ACPHi	22.9611	72014.9	3136.39	72014.9	3136.39
FA141ACPHi	22.9611	467515	20361.2	467515	20361.2
FA160ACPHi	22.9611	34673.1	1510.08	34673.1	1510.08
DTARTD	120.211	45441.5	378.015	45441.5	378.015
PLIPA2E161pp	66.3263	9331.08	140.684	9331.08	140.684
PLIPA2E180pp	66.3263	9300.05	140.217	9300.05	140.217
PLIPA2G120pp	66.3263	9331.1	140.685	9331.1	140.685
PLIPA2G180pp	66.3263	11670.7	175.959	11670.7	175.959
LPLIPAL1A161pp	94.4886	14398	152.378	14398	152.378
LPLIPAL1A160pp	94.4886	313499	3317.85	313499	3317.85
GALCTLO	36.4479	21845.2	599.354	21845.2	599.354
THRA_num1	90.6332	53168.7	586.636	53168.7	586.636
THRA_num2	145.979	53168.7	364.222	53168.7	364.222
XYLK2_num1	122.179	44532.5	364.486	44532.5	364.486
XYLK2_num2	110.31	44532.5	403.704	44532.5	403.704
GLDBRAN2	73.5767	31696.2	430.792	31696.2	430.792
POR5_num1	148.561	16213.8	109.139	16213.8	109.139
POR5_num2	148.525	16213.8	109.166	16213.8	109.166
HACD8_num1	159.188	30181.3	189.595	30181.3	189.595
HACD8_num2	77.0722	30181.3	391.597	30181.3	391.597
CTECOAI8	159.188	29862.2	187.591	29862.2	187.591
CTECOAI6	159.188	24446.5	153.57	24446.5	153.57
MALCOAMT	28.2762	9301.41	328.948	9301.41	328.948
OGMEACPS	67.0302	0.2448	0.00365209	0.2448	0.00365209
OGMEACPR	102.241	0.1224	0.00119717	0.1224	0.00119717
OPMEACPS	85.2266	0.0864	0.00101377	0.0864	0.00101377
DGUNC_num1	51.7825	17686	341.543	17686	341.543
DGUNC_num2	38.5456	17686	458.833	17686	458.833
DGUNC_num3	185.809	17686	95.1837	17686	95.1837
DGUNC_num4	67.727	17686	261.136	17686	261.136
DGUNC_num5	106.355	17686	166.291	17686	166.291
CDGUNPD_num1	74.665	126921	1699.88	126921	1699.88
CDGUNPD_num2	180.521	126921	703.084	126921	703.084
CDGUNPD_num3	171.215	126921	741.297	126921	741.297
CDGUNPD_num4	29.6012	126921	4287.71	126921	4287.71
CDGUNPD_num5	81.4498	126921	1558.28	126921	1558.28
LDGUNPD	74.665	44519.4	596.255	44519.4	596.255
MPTAT	63.667	2448	38.4501	2448	38.4501
MOADSUx	107.695	36042.6	334.673	36042.6	334.673
REPHACCOAI	28.4046	19156.9	674.43	19156.9	674.43
ACPPAT141	46.854	36607	781.3	36607	781.3
ACPPAT161	46.854	40006.8	853.861	40006.8	853.861
ACPPAT180	46.854	9699.08	207.006	9699.08	207.006
APG3PAT160	22.1934	18407.7	829.42	18407.7	829.42
APG3PAT161	22.1934	9694.95	436.839	9694.95	436.839
APG3PAT180	22.1934	47472.7	2139.05	47472.7	2139.05
ICYSDS	90.179	36	0.399206	36	0.399206
I4FE4SR	13.8486	7.2	0.519908	7.2	0.519908
S2FE2ST	183.333	9301.25	50.7342	9301.25	50.7342
BMOCOS	88.1345	72	0.816933	72	0.816933
BWCOS	88.1345	10232.1	116.096	10232.1	116.096
BWCOGDS1	21.6429	25790.7	1191.65	25790.7	1191.65
BWCOGDS2	21.6429	29065.1	1342.94	29065.1	1342.94
DHNPTE	108.956	19512.8	179.089	19512.8	179.089
DHMPTR	26.3483	37100.2	1408.07	37100.2	1408.07
I2FE2SS	104.028	9421.29	90.5652	9421.29	90.5652
I2FE2ST	60.0728	9353.64	155.705	9353.64	155.705
I2FE2SS2	104.028	9497.41	91.297	9497.41	91.297
I4FE4ST	60.0728	9505.12	158.227	9505.12	158.227
S4FE4ST	183.333	45270.4	246.93	45270.4	246.93
S2FE2SS2	277.201	25109.7	90.5831	25109.7	90.5831
BTS5	77.2962	7.2	0.0931482	7.2	0.0931482
3AMACHYD	28.8981	21702.1	750.989	21702.1	750.989
CCGS	25.5142	18471.6	723.972	18471.6	723.972
CDGR	65.175	18930.2	290.453	18930.2	290.453
MSAR_num1	21.5704	16893.1	783.159	16893.1	783.159
MSAR_num2	108.996	16893.1	154.988	16893.1	154.988
ACPPAT120	46.854	14929.4	318.636	14929.4	318.636
CPH4S	82.6373	15951.3	193.028	15951.3	193.028
SHCHCS3	27.6824	47273.2	1707.7	47273.2	1707.7
URACPAH	25.2087	23399.8	928.242	23399.8	928.242
POAACR	13.7629	17716.7	1287.28	17716.7	1287.28
ACPPAT160	46.854	20129.3	429.618	20129.3	429.618
ACPPAT181	46.854	14737.8	314.548	14737.8	314.548
APH141	10.2998	9504.15	922.751	9504.15	922.751
APH161	10.2998	10164.8	986.892	10164.8	986.892
APH180	10.2998	11053.2	1073.14	11053.2	1073.14
APH181	10.2998	17581	1706.93	17581	1706.93
GTHPi	20.4696	21215.2	1036.43	21215.2	1036.43
SEPHCHCS	122.734	24093.6	196.307	24093.6	196.307
DHNCOAS	189.798	26258.6	138.35	26258.6	138.35
DHNCOAT	59.781	11519.7	192.698	11519.7	192.698
I2FE2SR	104.028	9301.72	89.4159	9301.72	89.4159
TYRL	26.8961	21.6	0.80309	21.6	0.80309
THZPSN3	600.731	9779.04	16.2786	9779.04	16.2786
APG3PAT120	22.1934	9785.08	440.9	9785.08	440.9
APH120	10.2998	12613	1224.58	12613	1224.58
MOCDS	21.5138	18106.4	841.619	18106.4	841.619
FORCT	91.6564	37350.3	407.503	37350.3	407.503
PACCOAE	131.963	22170.2	168.003	22170.2	168.003
OXDHCOAT	70.6812	25910.4	366.581	25910.4	366.581
HADPCOADH3	51.7326	21560.1	416.761	21560.1	416.761
PYROX	59.9682	22381	373.214	22381	373.214
BMOGDS1	21.6429	27337.9	1263.13	27337.9	1263.13
MPTS	51.478	9753.69	189.473	9753.69	189.473
MOCOS	88.1345	72	0.816933	72	0.816933
BMOGDS2	21.6429	10255.6	473.855	10255.6	473.855
S2FE2SR	277.201	21311.9	76.8825	21311.9	76.8825
ACACT8r_num1	46.5305	23737.9	510.157	23737.9	510.157
ACACT8r_num2	81.7524	23737.9	290.363	23737.9	290.363
CTECOAI7	159.188	24212.6	152.101	24212.6	152.101
FDH4pp_num1	170.106	32854	193.138	32854	193.138
FDH4pp_num2	511.262	32854	64.2606	32854	64.2606
FDH5pp_num1	511.262	29922.6	58.5269	29922.6	58.5269
FDH5pp_num2	170.106	29922.6	175.905	29922.6	175.905
ACPPAT140	46.854	9697.48	206.972	9697.48	206.972
APG3PAT140	22.1934	38886.4	1752.16	38886.4	1752.16
APG3PAT141	22.1934	25623.6	1154.56	25623.6	1154.56
APG3PAT181	22.1934	9481.37	427.216	9481.37	427.216
APH140	10.2998	9504.2	922.756	9504.2	922.756
APH160	10.2998	19803.9	1922.74	19803.9	1922.74
OPMEACPD	102.198	0.0792	0.000774969	0.0792	0.000774969
EPMEACPR	111.456	0.108	0.000968994	0.108	0.000968994
AOXSr2	83.1885	3.6	0.0432752	3.6	0.0432752
SCYSDS	120.468	30061	249.535	30061	249.535
S2FE2SS	277.201	9300.82	33.5526	9300.82	33.5526
S4FE4SR	156.733	74931.4	478.084	74931.4	478.084
SELR	233.042	13273.5	56.9575	13273.5	56.9575
OGMEACPD	102.198	0.0792	0.000774969	0.0792	0.000774969
EGMEACPR	111.456	0.108	0.000968994	0.108	0.000968994
OPMEACPR	102.241	0.1224	0.00119717	0.1224	0.00119717
PMEACPE	28.505	14.4	0.505175	14.4	0.505175
MECDPDH5_num1	60.3838	9667.01	160.093	9667.01	160.093
MECDPDH5_num2	60.4206	9667.01	159.995	9667.01	159.995
RNTR1c2_num1	179.782	49229.9	273.831	49229.9	273.831
RNTR1c2_num2	242.425	49229.9	203.073	49229.9	203.073
RNTR1c2_num3	242.388	49229.9	203.104	49229.9	203.104
RNTR1c2_num4	179.745	49229.9	273.887	49229.9	273.887
RNTR2c2_num1	242.425	30111.1	124.208	30111.1	124.208
RNTR2c2_num2	242.388	30111.1	124.227	30111.1	124.227
RNTR2c2_num3	179.745	30111.1	167.521	30111.1	167.521
RNTR2c2_num4	179.782	30111.1	167.487	30111.1	167.487
RNTR3c2_num1	179.745	34677.1	192.924	34677.1	192.924
RNTR3c2_num2	242.425	34677.1	143.043	34677.1	143.043
RNTR3c2_num3	242.388	34677.1	143.065	34677.1	143.065
RNTR3c2_num4	179.782	34677.1	192.884	34677.1	192.884
RNTR4c2_num1	179.782	16403.8	91.2425	16403.8	91.2425
RNTR4c2_num2	242.425	16403.8	67.6654	16403.8	67.6654
RNTR4c2_num3	242.388	16403.8	67.6756	16403.8	67.6756
RNTR4c2_num4	179.745	16403.8	91.2611	16403.8	91.2611
FLDR2_num1	47.4511	47286.7	996.535	47286.7	996.535
FLDR2_num2	47.4879	47286.7	995.763	47286.7	995.763
FESR	24.8826	71840.5	2887.18	71840.5	2887.18
OXCOAHDH	73.0026	73883.7	1012.07	73883.7	1012.07
DHACOAH	27.2374	23116.4	848.701	23116.4	848.701
THFAT	90.6332	30546.8	337.038	30546.8	337.038
FOMETRi	21.1054	13204.7	625.655	13204.7	625.655
GDPTPDP	79.3424	184851	2329.79	184851	2329.79
COLIPAKpp	26.7591	30763.5	1149.65	30763.5	1149.65
MPTSS	53.4377	6120	114.526	6120	114.526
CPMPS	142.15	19871.4	139.792	19871.4	139.792
LIPOCT	23.8825	9300.47	389.426	9300.47	389.426
LIPOS	72.1434	9300.55	128.918	9300.55	128.918
OCTNLL	37.9259	22382.3	590.158	22382.3	590.158
LIPATPT	37.9259	25688	677.322	25688	677.322
LIPAMPL	37.9259	15754.4	415.399	15754.4	415.399
ALDD19xr	214.797	24043.9	111.938	24043.9	111.938
MMM	155.743	728301	4676.31	728301	4676.31
MOGDS	21.6429	20487.1	946.596	20487.1	946.596
WCOS	88.1345	78540.2	891.14	78540.2	891.14
VPAMTr	46.7112	20916.2	447.778	20916.2	447.778
3OXCOAT	42.2765	24123.3	570.607	24123.3	570.607
2DGULRGx	70.791	17496.3	247.154	17496.3	247.154
2DGULRGy	70.791	9611.08	135.767	9611.08	135.767
AP4AS	115.653	23738.4	205.255	23738.4	205.255
13PPDH2	84.194	9783.38	116.2	9783.38	116.2
APCS	64.6428	13709.8	212.086	13709.8	212.086
GHBDHx	124.633	21755.7	174.559	21755.7	174.559
APPLDHr	309.698	10147.8	32.7667	10147.8	32.7667
G2PP	29.1721	10610.8	363.732	10610.8	363.732
DHNPA2r	108.956	6120	56.1694	6120	56.1694
SHGO	46.0819	22357.8	485.175	22357.8	485.175
NADHXD	54.6503	65061.6	1190.51	65061.6	1190.51
NADPHHR	142.13	36321.9	255.554	36321.9	255.554
NADPHHS	142.13	34672.7	243.951	34672.7	243.951
NADHHS	142.13	309126	2174.95	309126	2174.95
NADHXE	54.6503	13737.7	251.375	13737.7	251.375
PYK2	205.429	27680.9	134.747	27680.9	134.747
PYK3	205.429	45020.6	219.155	45020.6	219.155
PYK4	205.429	23979.3	116.728	23979.3	116.728
NADPHXD	54.6503	10822.9	198.039	10822.9	198.039
NADHHR	142.13	18063.3	127.09	18063.3	127.09
NADPHXE	54.6503	21726	397.545	21726	397.545
FE3DHBZS3R	28.8716	10690.3	370.269	10690.3	370.269
DXYLTD_num1	69.3992	77138	1111.51	77138	1111.51
DXYLTD_num2	70.0168	77138	1101.71	77138	1101.71
2DDARAA_num1	32.7217	28422.2	868.605	28422.2	868.605
2DDARAA_num2	130.122	28422.2	218.428	28422.2	218.428
GNP_num1	24.6643	22285.8	903.566	22285.8	903.566
GNP_num2	20.7798	22285.8	1072.48	22285.8	1072.48
ALLTAMH2	91.388	218032	2385.78	218032	2385.78
UGCIAMH	28.7304	257943	8978.05	257943	8978.05
[truncated: 434 more rows]

## Sheet: Table S4 Enzyme cost
Table S4 Enzyme cost of energy metabolism in E. coli
	ATP produced per flux of glucose	Enzyme required per flux of glucose	Enzyme cost
	(mmol/gDW/h)	(mg enzyme / gDW)	(g enzyme for 1 mol ATP / h)
High-yield pathway	23.5	55.99	2.38
Low-yield pathway	11	6.83	0.62
Original data:
ID	High-yield pathway	Low-yield pathway flux	kcat/MW	High-yield pathway enzyme cost	Low-yield pathway enzyme cost
	(mmol/gDW/h)		(/h/kDa)	(mg enzyme / gDW)
GLCptspp	1	1	no kact	0	0
PGI	1	1	334082	0.00299327	0.00299327
PFK	1	1	15417.8	0.0648601	0.0648601
FBA	1	1	4000.28	0.249982	0.249982
TPI	1	1	4805.02	0.208116	0.208116
GAPD	2	2	25303.6	0.0790402	0.0790402
PGK	2	2	3677.2	0.543892	0.543892
PGM	2	2	4323.71	0.462565	0.462565
ENO	2	2	9068.02	0.220555	0.220555
PYK	1	1	2106.49	0.474723	0.474723
PDH	2	2	784.108	2.55067	2.55067
CS	2	0	362.387	5.51896	0
ACONTa	2	0	416.49	4.80203	0
ACONTb	2	0	546.642	3.6587	0
ICDHyr	2	0	432.724	4.62189	0
AKGDH	2	0	1487.1	1.3449	0
SUCOAS	2	0	201.019	9.94932	0
SUCDi	2	0	1079.11	1.85339	0
FUM	2	0	867.934	2.30432	0
MDH	2	0	400.776	4.99032	0
ATPS4rpp	19.5	7	12744.7	1.53005	0.54925
NADH16pp	10	4	9992.34	1.00077	0.400307
CYTBO3_4pp	12	4	14260.6	0.841477	0.280492
NADTRHD	2	0	229.329	8.72108	0
PTAr	0	2	7594.55	0	0.263347
ACKr	0	2	4203.2	0	0.475828

## Sheet: Table S5 Maximum growth rates
Table S5 The maximum growth rates
Carbon sources name	measured (h-1)	predicted by ECM_eco1515(h-1)	predicted by iML1515(h-1)	predicted by GECKO(h-1)	predicted by sMOMENT(h-1)
N-Acetyl-D-glucosamine	0.61 ±0.03	0.618304	1.12199	0.215282	0.215028
Acetate	0.29 ±0.02	0.208818	0.208818	0.132755	0.132755
2-Oxoglutarate	0.24 ±0.04	0.472914	0.543203	0.188904	0.188904
L-Alanine	0.24 ±0.03	0.347477	0.377704	0.160986	0.160986
Fructose	0.54 ±0.04	0.676556	0.869773	0.201886	0.201886
Fumarate	0.47 ±0.03	0.394876	0.408581	0.199173	0.199173
Glucose 6-phosphate	0.78 ±0.04	0.693271	0.897753	0.275449	0.275449
Galactose	0.24 ±0.02	0.574846	0.860446	0.208941	0.208941
Glucosamine	0.4 ±0.03	0.652884	0.870079	0.197373	0.197373
Gluconate	0.68 ±0.03	0.625908	0.79217	0.205722	0.205722
Glucose	0.66 ±0.05	0.680244	0.869773	0.223457	0.223457
Glycerol	0.47 ±0.03	0.427881	0.491631	0.227284	0.227284
Guanosine	0.37 ±0.03	0.474803	1.02953	0.266745	0.266745
L-Lactate	0.41 ±0.03	0.347103	0.347103	0.168285	0.168285
Maltose	0.52 ±0.02	0.602326	1.76514	0.147628	0.147628
L-Malate	0.55 ±0.03	0.408578	0.408581	0.192384	0.192384
Mannose	0.35 ±0.03	0.652277	0.869773	0.199997	0.199997
Mannitol	0.61 ±0.03	0.65657	0.93506	0.220425	0.220425
Pyruvate	0.41 ±0.03	0.311735	0.311735	0.152165	0.152165
Ribose	0.41 ±0.01	0.538467	0.683238	0.17121	0.17121
Sorbitol	0.48 ±0.03	0.549674	0.93506	0.21752	0.21752
Succinate	0.5 ±0.02	0.425785	0.447258	0.19521	0.19521
Trehalose	0.48 ±0.04	0.672342	1.76514	0.245393	0.245393
Xylose	0.51 ±0.03	0.378507	0.711218	0.177465	0.177465
